# Supplementary material
Source: PubMed Central journal article supplement (PMC3028868)
Supplement: supp_79_2_695__1.pdf [file supp_79_2_695__1.pdf]

## **Supplementary material**

### **Animal infection**

Holstein cows in the fourth month of their first lactation have experimentally been infected with mastitis pathogens. Details of the experimental udder infections, the clinical aspects and sample collection have previously been described (1). Briefly, one udder quarter of each animal was kept as an uninfected control the other ones were 6, 12, or 24 h infected with 500 CFU *E. coli* strain 1303. Udder tissue samples were collected aseptically within 5 to 10 min after killing the cow and snap frozen in liquid nitrogen. Mammary tissue (50 to 200 mg) was powdered under liquid nitrogen and mixed with a chaotropic lysis buffer (RLT, RNeasy Kit, Qiagen, Hilden, Germany). RNA was extracted with Phenol (Ambion, Darmstadt, Germany), purified (RNeasy spin columns, Qiagen) and contaminating DNA was removed (DNase I digestion, Qiagen).

### **Profiling the pathogen-specific kinetics of mounting the mammary immune defence is difficult in cows, but feasible in pbMEC**

In the course of validating the udder samples we found that the *E. coli* infection resulted in pronounced alterations in the mRNA abundance of candidate genes for immune response. However, the time course varied considerably between the animals hampering a statistically clear cut analysis. We noticed, though that some of the candidate genes encoding immune relevant factors were co-regulated over time in an animal-specific fashion (Supplementary figure S1A; *IL1A-IL-8*; *IL-6-CCL2*; *S100A8-S100A12*). This co-regulation proved to be statistically significant, comparing sixteen udder quarters harbouring the *E. coli* pathogens for 0 h, 6 h, 12 h and 24 h (Supplementary table 2A). We used this co-regulation as a diagnostic criterion to evaluate if cultures of primary bovine mammary epithelial cells (pbMEC) would reflect such complex regulation patterns. We thus challenged three pbMEC

preparations established from udders of three different cows for one, three, six, and 24 h with  $10^7$  per ml of heat inactivated *E. coli* strain 1303 particles and determined the kinetics of modulating the mRNA abundance of those candidate genes. We found the very same pairs of genes to be co-regulated in these cultures over the entire time period of the challenge (Supplemental figure S1B) again in a statistically significant fashion (Supplemental table 2B).

### **UV-inactivation of pathogens**

*E. coli* and *S. aureus* pathogens were grown to the logarithmic phase as described in Material and Methods. Cells were spun down, washed twice with PBS and resuspended herein at a density of  $1 \times 10^8$ /ml. For UV irradiation, 12 ml of a culture was placed in a sterile 9 cm Petri dish with the lid removed. The dish was cooled on ice and exposed to the UV light using a UV-Crosslinker (BLX-254, Biometra, Goettingen, Germany) for 5 min at  $99.99 \text{ J/cm}^2$ . Afterwards the cell suspensions were again spun down and resuspended in RPMI 1640 at a density of  $5 \times 10^8$ /ml. The killing of all cells was verified by control plating.

1. **Petzl, W., H. Zerbe, J. Gunther, W. Yang, H. M. Seyfert, G. Nurnberg, and H. J. Schuberth.** 2008. *Escherichia coli*, but not *Staphylococcus aureus* triggers an early increased expression of factors contributing to the innate immune defense in the udder of the cow. *Vet. Res.* **39**:18.

**A**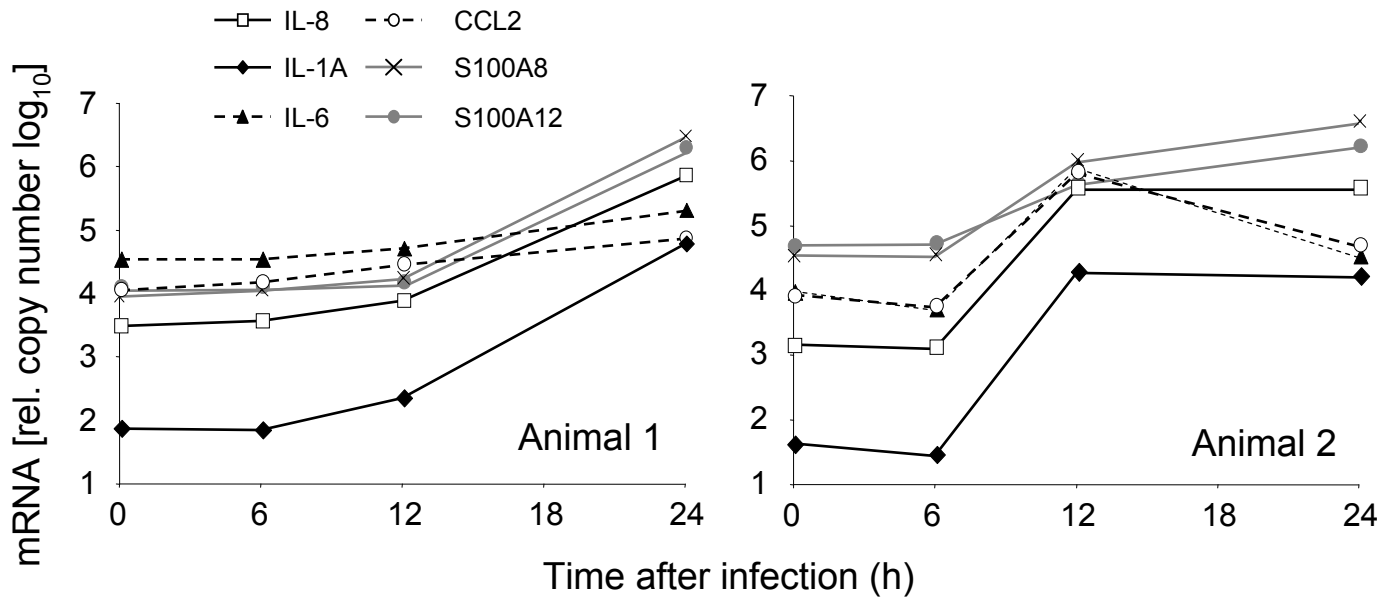**B**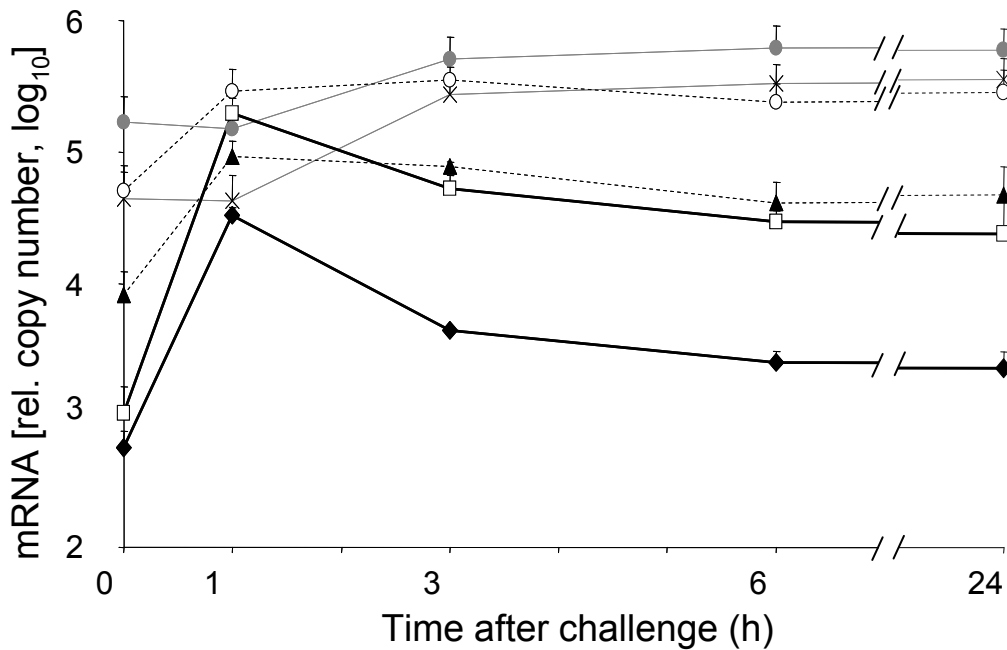

**Figure S1.** Time course of alterations in the mRNA abundance of immune relevant genes. (A) Udder quarters from two different animals were infected with live *E. coli*<sub>1303</sub> (500 CFU for the time as indicated (abscissa) and relative mRNA copy numbers (ordinate) of *IL-1A*, *IL-8*, *IL-6*, *CCL2*, *S100A8*, *S100A12* measured with qRT-PCR in uninfected control and infected quarters. (B) Relative mRNA copy numbers of the same genes measured in pbMEC cultures challenged with heat inactivated *E. coli* particles (10<sup>7</sup>/ml) for the indicated time. Values represent means (± S.E.M.) from three independent biological replicas.

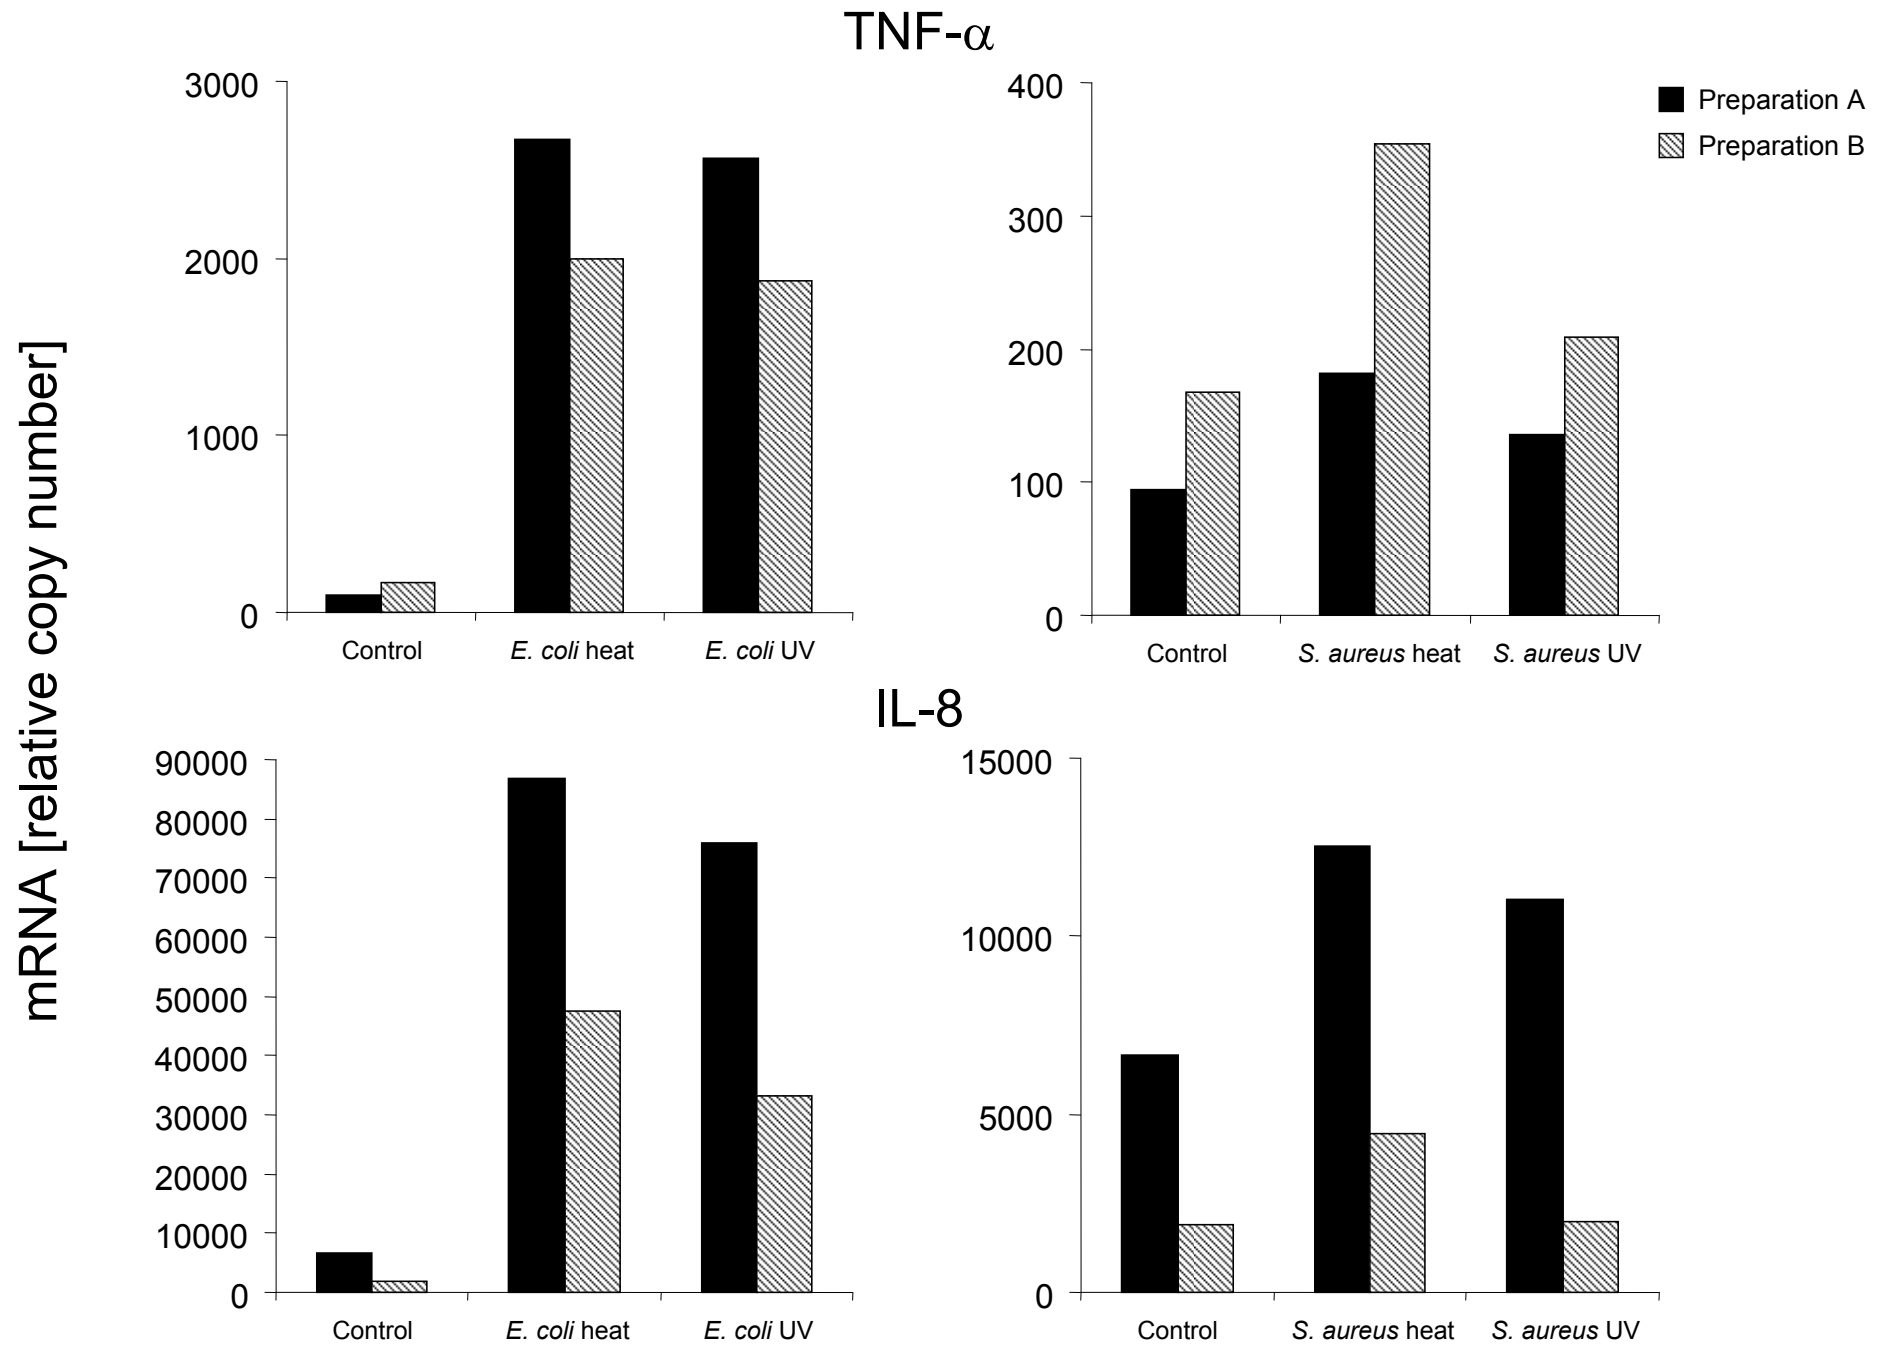

**Figure S2.** Induction of cytokine expression in pbMEC after challenge with heat- or UV-inactivated pathogens. Two pbMEC preparations (A, B) from two different animals were left unchallenged (control) or were challenged for 3 h with  $10^7$  heat- or UV-inactivated *E. coli* or *S. aureus* particles. Relative mRNA copy numbers of TNF- $\alpha$  and IL-8 were measured by qRT-PCR.

Table S1. Sequences of oligonucleotide primers used for real-time PCR quantification.

| Gene        | GenBank no.               | Primer sequence (5'-3')                              | Amplificate size (bp) |
|-------------|---------------------------|------------------------------------------------------|-----------------------|
| LAP         | NM_203435                 | AGGCTCCATCACCTGCTCCTT *<br>CCTGCAGCATTCTTACTTGGGCT * | 182                   |
| CCL2        | NM_174006.2               | CGCTGCAACATGAAGGTCTC<br>TGGGGTCTGCACATAACTCCT        | 244                   |
| IL6         | NM_000600.3               | GGAGGAAAAGGACGGATGCT<br>GGTCAGTGTGGTGGCTGGA          | 227                   |
| IL8         | NM_173925                 | CCTCTTGTTCAATATGACTTCCA<br>GGCCCACTCTCAATAACTCTC     | 170                   |
| IL1A        | NM_174092                 | GGCCAAAGTCCCTGACCTCT<br>CTGCCACCATCACCACATTC         | 224                   |
| CCL5        | NM_175827                 | TCCCCATATGCCTCGGAC<br>TCGCACCCACTTCTTCTCTG           | 229                   |
| TNF         | NM_173966.2               | CTTCTGCCTGCTGCACTTCG<br>GAGTTGATGTCGGCTACAACG        | 156                   |
| LTF         | NM_180998.2               | CTGTGGCTAAATTCTTCTCTGC<br>TTAACAAAAGCCACGTCTCCAG     | 187                   |
| NFKB1       | NM_001076409.1            | TCAAACCTCCAGAATGGCAGA<br>GAAATCCTCTCTGTTTAGGTTGCTC   | 179                   |
| S100A8      | NM_001113725.1            | TCTATTTTGGGGAGACCTGGTG<br>CCAAGTGTCCGCATCCTTTT       | 203                   |
| S100A12     | NM_174651.2               | AGGGAATCATCAACATCTTCCAC<br>TCTTTATCGGCATCCAGGTCTT    | 172                   |
| NOS2A       | NM_001076799              | ACAGGATGACCCCAAACGTC<br>TCTGGTGAAGCGTGTCTTGG         | 188                   |
| IFN $\beta$ | NM_174350<br>NM_001015617 | TTCTCCACCACAGCTCTTTCC<br>TGGCATCTTCCTTCYGGAACT       | 187                   |

\*upper line: forward-, lower line, reverse-primer

Table S2A: Correlation of the mRNA concentrations, sampled from control quarters or those infected with *E. coli*<sub>1303</sub> for 6, 12 and 24 h of four cows.

| Gene   | IL1A          | CCL2 | IL6           | S100A8 | S100A12       |
|--------|---------------|------|---------------|--------|---------------|
| IL8    | <b>0.94**</b> | 0.48 | 0.47          | 0.76** | 0.89**        |
| IL1A   |               | 0.33 | 0.41          | 0.55*  | 0.76**        |
| CCL2   |               |      | <b>0.93**</b> | 0.27   | 0.25          |
| IL6    |               |      |               | 0.08   | 0.14          |
| S100A8 |               |      |               |        | <b>0.96**</b> |

Pearson Product Moment Correlation; bold letter  $r > 0.90$ ; \*  $p < 0.05$ ; \*\*  $p < 0.01$

Table S2B: Correlation of the mRNA concentrations in pbMEC cultures (n, 3) challenged with heat inactivated *E. coli*<sub>1303</sub> particles for 0, 1, 3, 6, and 24 h.

|        | IL1A          | CCL2 | IL6           | S100A8 | S100A12       |
|--------|---------------|------|---------------|--------|---------------|
| IL8    | <b>0.95**</b> | 0.13 | 0.46          | -0.26  | -0.17         |
| IL1A   |               | 0.15 | 0.50          | -0.37  | -0.31         |
| CCL2   |               |      | <b>0.90**</b> | -0.21  | -0.20         |
| IL6    |               |      |               | -0.33  | -0.30         |
| S100A8 |               |      |               |        | <b>0.96**</b> |

Pearson Product Moment Correlation; bold letter  $r > 0.90$ ; \*  $p < 0.05$ ; \*\*  $p < 0.01$

Table S3. Correlation of relative mRNA concentrations determined in microarray hybridizations or qRT-PCR from three biological replica of pbMEC stimulated for 0, 1, 3, 6, 24 h with  $10^7$  particles / ml of heat inactivated *E. coli*<sub>1303</sub>.

| <b>Gene</b> | <b>SRCC*</b> |
|-------------|--------------|
| CCL2        | 0.96         |
| CCL5        | 0.98         |
| DEFB4/LAP   | 0.99         |
| IL1A        | 0.99         |
| IL6         | 0.93         |
| IL8         | 0.95         |
| LTF         | 0.96         |
| NFKB1/p50   | 0.86         |
| NOS2A       | 1.00         |
| TNF         | 0.93         |
| <b>mean</b> | <b>0.95</b>  |

\* Spearman's rank correlation coefficient

**Table S4A: Human ortholog genes eligible for IPA, with maximal regulation at indicated time points**

**A) Genes regulated in *E. coli* stimulated pbMEC**

| Symbol                                         | Entrez Gene Name                                                                     | fold change |            |            |           | Bovine Affy.-ID  | Type (IPA)                        |
|------------------------------------------------|--------------------------------------------------------------------------------------|-------------|------------|------------|-----------|------------------|-----------------------------------|
|                                                |                                                                                      | 1 h         | 3 h        | 6 h        | 24 h      |                  |                                   |
| <b>Maximum regulated 1 h after stimulation</b> |                                                                                      |             |            |            |           |                  |                                   |
| <b>CXCL1</b>                                   | chemokine (C-X-C motif) ligand 1                                                     | <b>779</b>  | <b>142</b> | <b>78</b>  | <b>43</b> | Bt.611.1.S1_at   | cytokine                          |
| <b>CCL20</b>                                   | chemokine (C-C motif) ligand 20                                                      | <b>529</b>  | <b>479</b> | <b>137</b> | <b>69</b> | Bt.9560.1.S1_at  | cytokine                          |
| <b>IL8</b>                                     | interleukin 8                                                                        | <b>384</b>  | <b>144</b> | <b>103</b> | <b>71</b> | Bt.155.1.S1_at   | cytokine                          |
| <b>CXCL2</b>                                   | chemokine (C-X-C motif) ligand 2                                                     | <b>348</b>  | <b>223</b> | <b>144</b> | <b>98</b> | Bt.610.1.A1_at   | cytokine                          |
| <b>IL1A</b>                                    | interleukin 1, alpha                                                                 | <b>123</b>  | <b>24</b>  | <b>5</b>   | <b>4</b>  | Bt.191.1.S1_at   | cytokine                          |
| RND1                                           | Rho family GTPase 1                                                                  | <b>92</b>   | <b>84</b>  | <b>33</b>  | <b>22</b> | Bt.3774.1.A1_at  | enzyme                            |
| MAP3K8                                         | mitogen-activated protein kinase kinase kinase 8                                     | <b>84</b>   | <b>19</b>  | <b>15</b>  | <b>8</b>  | Bt.28561.1.S1_at | kinase                            |
| CYP1B1                                         | cytochrome P450, family 1, subfamily B, polypeptide 1                                | <b>63</b>   | <b>41</b>  | <b>5</b>   | -         | Bt.16058.1.A1_at | enzyme                            |
| <b>TNFAIP3</b>                                 | tumor necrosis factor, alpha-induced protein 3                                       | <b>40</b>   | <b>8</b>   | <b>6</b>   | <b>5</b>  | Bt.17514.1.S1_at | other                             |
| <b>NFKBIA</b>                                  | nuclear factor of kappa light polypeptide gene enhancer in B-cells inhibitor, alpha  | <b>39</b>   | <b>15</b>  | <b>11</b>  | <b>8</b>  | Bt.9027.1.S1_at  | other                             |
| <b>NFKBIZ</b>                                  | nuclear factor of kappa light polypeptide gene enhancer in B-cells inhibitor, zeta   | <b>27</b>   | <b>8</b>   | <b>8</b>   | <b>5</b>  | Bt.8227.1.S1_at  | transcription regulator           |
| IRF1                                           | interferon regulatory factor 1                                                       | <b>18</b>   | <b>9</b>   | <b>3</b>   | <b>2</b>  | Bt.10077.1.S2_at | transcription regulator           |
| <b>CXCL3</b>                                   | chemokine (C-X-C motif) ligand 3                                                     | <b>17</b>   | <b>7</b>   | <b>8</b>   | <b>6</b>  | Bt.23093.1.S1_at | cytokine                          |
| <b>CD83</b>                                    | CD83 molecule                                                                        | <b>11</b>   | -          | -          | -         | Bt.3841.1.S1_at  | other                             |
| NR4A2                                          | nuclear receptor subfamily 4, group A, member 2                                      | <b>9</b>    | <b>2</b>   | <b>2</b>   | <b>2</b>  | Bt.10060.1.S1_at | ligand-dependent nuclear receptor |
| NFKBID                                         | nuclear factor of kappa light polypeptide gene enhancer in B-cells inhibitor, delta  | <b>8</b>    | -          | -          | -         | Bt.10867.1.S1_at | other                             |
| TIPARP                                         | TCDD-inducible poly(ADP-ribose) polymerase                                           | <b>7</b>    | <b>3</b>   | -          | -         | Bt.23611.3.S1_at | other                             |
| <b>IER3</b>                                    | immediate early response 3                                                           | <b>7</b>    | <b>2</b>   | <b>2</b>   | <b>2</b>  | Bt.2153.1.S1_at  | other                             |
| G0S2                                           | G0/G1switch 2                                                                        | <b>7</b>    | <b>5</b>   | -          | -         | Bt.4137.1.A1_at  | other                             |
| <b>TNF</b>                                     | tumor necrosis factor (TNF superfamily, member 2)                                    | <b>7</b>    | -          | -          | -         | Bt.12756.1.S1_at | cytokine                          |
| BMP2                                           | bone morphogenetic protein 2                                                         | <b>7</b>    | <b>6</b>   | <b>3</b>   | <b>2</b>  | Bt.29956.1.A1_at | growth factor                     |
| <b>PLAU</b>                                    | plasminogen activator, urokinase                                                     | <b>6</b>    | <b>4</b>   | <b>2</b>   | <b>2</b>  | Bt.2519.1.S1_at  | peptidase                         |
| <b>ZFP36</b>                                   | zinc finger protein 36, C3H type, homolog (mouse)                                    | <b>5</b>    | -          | -          | -         | Bt.3863.1.S1_at  | transcription regulator           |
| DLX2                                           | distal-less homeobox 2                                                               | <b>5</b>    | -          | -          | -         | Bt.13363.1.A1_at | transcription regulator           |
| PPP1R15A                                       | protein phosphatase 1, regulatory (inhibitor) subunit 15A                            | <b>5</b>    | -          | -          | -         | Bt.1187.1.S1_at  | other                             |
| <b>ICAM1</b>                                   | intercellular adhesion molecule 1                                                    | <b>5</b>    | <b>2</b>   | -          | -         | Bt.18355.1.A1_at | transmembrane receptor            |
| SIK1                                           | salt-inducible kinase 1                                                              | <b>5</b>    | <b>3</b>   | <b>2</b>   | <b>3</b>  | Bt.21518.1.S1_at | kinase                            |
| FOSL1                                          | FOS-like antigen 1                                                                   | <b>5</b>    | <b>4</b>   | -          | -         | Bt.17885.1.A1_at | transcription regulator           |
| KCNK5                                          | potassium channel, subfamily K, member 5                                             | <b>4</b>    | <b>2</b>   | -          | -         | Bt.15691.1.S1_at | ion channel                       |
| PIM1                                           | pim-1 oncogene                                                                       | <b>3</b>    | -          | -          | -         | Bt.272.1.S1_at   | kinase                            |
| <b>PDE4B</b>                                   | phosphodiesterase 4B, cAMP-specific (phosphodiesterase E4 dunce homolog, Drosophila) | <b>3</b>    | <b>2</b>   | <b>2</b>   | <b>2</b>  | Bt.20286.1.S1_at | enzyme                            |
| RCAN1                                          | regulator of calcineurin 1                                                           | <b>3</b>    | <b>3</b>   | -          | -         | Bt.6377.1.S1_at  | transcription regulator           |
| <b>ETS2</b>                                    | v-ets erythroblastosis virus E26 oncogene homolog 2 (avian)                          | <b>3</b>    | -          | -          | -         | Bt.5774.1.S1_at  | transcription regulator           |
| AXUD1                                          | AXIN1 up-regulated 1                                                                 | <b>3</b>    | -          | -          | -         | Bt.20215.1.S1_at | other                             |
| BTG2                                           | BTG family, member 2                                                                 | <b>3</b>    | -          | -          | -         | Bt.5326.2.S1_at  | transcription regulator           |
| <b>RGS2</b>                                    | regulator of G-protein signaling 2, 24kDa                                            | <b>3</b>    | <b>2</b>   | -          | -         | Bt.10855.1.S1_at | other                             |
| ITPKC                                          | inositol 1,4,5-trisphosphate 3-kinase C                                              | <b>3</b>    | <b>2</b>   | -          | -         | Bt.21658.1.S1_at | kinase                            |
| NR4A1                                          | nuclear receptor subfamily 4, group A, member 1                                      | <b>3</b>    | -          | -          | -         | Bt.23373.1.S1_at | ligand-dependent nuclear receptor |
| SPRY2                                          | sprouty homolog 2 (Drosophila)                                                       | <b>2</b>    | -          | -          | -         | Bt.28178.1.A1_at | other                             |
| ENC1                                           | ectodermal-neural cortex (with BTB-like domain)                                      | <b>2</b>    | -          | -          | -         | Bt.26781.1.A1_at | peptidase                         |
| <b>JUNB</b>                                    | jun B proto-oncogene                                                                 | <b>2</b>    | -          | -          | -         | Bt.20542.1.S1_at | transcription regulator           |
| <b>NFIL3</b>                                   | nuclear factor, interleukin 3 regulated                                              | <b>2</b>    | <b>2</b>   | -          | -         | Bt.27854.2.S1_at | transcription regulator           |
| ZNF207                                         | zinc finger protein 207                                                              | <b>-2</b>   | -          | -          | -         | Bt.21777.1.S1_at | transcription regulator           |
| HNRPLL                                         | heterogeneous nuclear ribonucleoprotein L-like                                       | <b>-2</b>   | -          | -          | -         | Bt.18908.1.S1_at | other                             |



|              |                                                                                                                |    |    |   |   |                  |                         |
|--------------|----------------------------------------------------------------------------------------------------------------|----|----|---|---|------------------|-------------------------|
| VTI1A        | vesicle transport through interaction with t-SNAREs homolog 1A (yeast)                                         | -2 | -  | - | - | Bt.27023.1.S1_at | transporter             |
| SQRDL        | sulfide quinone reductase-like (yeast)                                                                         | -2 | -  | - | - | Bt.10130.1.S1_at | enzyme                  |
| NFIB         | nuclear factor I/B                                                                                             | -2 | -  | - | - | Bt.25067.1.A1_at | transcription regulator |
| RBM14        | RNA binding motif protein 14                                                                                   | -2 | -  | - | - | Bt.13507.1.S1_at | transcription regulator |
| NCOA4        | nuclear receptor coactivator 4                                                                                 | -2 | -  | - | - | Bt.24296.1.A1_at | transcription regulator |
| ATP6V0E1     | ATPase, H+ transporting, lysosomal 9kDa, V0 subunit e1                                                         | -2 | -  | - | - | Bt.7672.1.A1_at  | transporter             |
| <b>ERBB2</b> | v-erb-b2 erythroblastic leukemia viral oncogene homolog 2, neuro/glioblastoma derived oncogene homolog (avian) | -2 | -  | - | - | Bt.19318.1.A1_at | kinase                  |
| PLS1         | plastin 1 (I isoform)                                                                                          | -2 | -  | - | - | Bt.20756.1.A1_at | other                   |
| RIT1         | Ras-like without CAAX 1                                                                                        | -2 | -  | - | - | Bt.24892.1.A1_at | enzyme                  |
| CCDC7        | coiled-coil domain containing 7                                                                                | -2 | -  | - | - | Bt.680.2.A1_at   | other                   |
| GBAS         | glioblastoma amplified sequence                                                                                | -3 | -  | - | - | Bt.11538.1.A1_at | other                   |
| ZNF235       | zinc finger protein 235                                                                                        | -3 | -  | - | - | Bt.18686.1.A1_at | other                   |
| GCLM         | glutamate-cysteine ligase, modifier subunit                                                                    | -3 | -  | - | - | Bt.19533.2.A1_at | enzyme                  |
| VCL          | vinculin                                                                                                       | -3 | -2 | - | - | Bt.20821.1.A1_at | enzyme                  |
| FBXO4        | F-box protein 4                                                                                                | -4 | -  | - | - | Bt.1589.1.S1_at  | enzyme                  |
| ARL4A        | ADP-ribosylation factor-like 4A                                                                                | -5 | -3 | - | - | Bt.7170.1.S1_at  | enzyme                  |
| KRT15        | keratin 15                                                                                                     | -7 | -4 | - | - | Bt.22801.1.S1_at | other                   |

#### Maximum regulated 3 h after stimulation

|               |                                                                           |     |      |     |    |                  |                         |
|---------------|---------------------------------------------------------------------------|-----|------|-----|----|------------------|-------------------------|
| CYP1A1        | cytochrome P450, family 1, subfamily A, polypeptide 1                     | 437 | 1257 | 429 | 3  | Bt.13772.1.A1_at | enzyme                  |
| <b>NOS2</b>   | nitric oxide synthase 2, inducible                                        | 10  | 377  | 54  | 15 | Bt.8479.1.A1_at  | enzyme                  |
| RSAD2         | radical S-adenosyl methionine domain containing 2                         | -   | 108  | 57  | 9  | Bt.24467.1.S1_at | enzyme                  |
| BCL2A1        | BCL2-related protein A1                                                   | 3   | 59   | 15  | 3  | Bt.7542.1.S1_at  | other                   |
| SLC27A1       | solute carrier family 27 (fatty acid transporter), member 1               | -   | 44   | 37  | 7  | Bt.15788.3.S1_at | transporter             |
| IFIT2         | interferon-induced protein with tetratricopeptide repeats 2               | -   | 41   | 18  | 5  | Bt.24795.1.A1_at | other                   |
| <b>IL6</b>    | interleukin 6 (interferon, beta 2)                                        | 32  | 39   | 13  | 11 | Bt.3686.1.S1_at  | cytokine                |
| ADAMTS4       | ADAM metalloproteinase with thrombospondin type 1 motif, 4                | 5   | 34   | 8   | 6  | Bt.15675.1.S1_at | peptidase               |
| TNFAIP2       | tumor necrosis factor, alpha-induced protein 2                            | 6   | 33   | 8   | 4  | Bt.9570.1.S1_at  | other                   |
| BIRC3         | baculoviral IAP repeat-containing 3                                       | 16  | 28   | 6   | 4  | Bt.9391.2.S1_at  | enzyme                  |
| <b>TLR2</b>   | toll-like receptor 2                                                      | 3   | 22   | 12  | 5  | Bt.8945.1.S1_at  | transmembrane receptor  |
| <b>PTGS2</b>  | prostaglandin-endoperoxide synthase 2                                     | 12  | 18   | 10  | 11 | Bt.15758.1.S1_at | enzyme                  |
| BIRC2         | baculoviral IAP repeat-containing 2                                       | 11  | 17   | 7   | 4  | Bt.9391.1.A1_at  | other                   |
| <b>SOD2</b>   | superoxide dismutase 2, mitochondrial                                     | 2   | 16   | 16  | 13 | Bt.2501.2.A1_at  | enzyme                  |
| NAV3          | neuron navigator 3                                                        | -   | 15   | 2   | -  | Bt.25031.1.S1_at | other                   |
| MXI1          | MAX interactor 1                                                          | 5   | 15   | 12  | 5  | Bt.20431.2.S1_at | transcription regulator |
| NFATC1        | nuclear factor of activated T-cells, cytoplasmic, calcineurin-dependent 1 | -   | 13   | 2   | -  | Bt.26630.1.S1_at | transcription regulator |
| <b>CLL2</b>   | chemokine (C-C motif) ligand 2                                            | 6   | 13   | 7   | 8  | Bt.2408.1.S1_at  | cytokine                |
| <b>OLR1</b>   | oxidized low density lipoprotein (lectin-like) receptor 1                 | 2   | 12   | 7   | 6  | Bt.367.1.S1_at   | transmembrane receptor  |
| <b>CX3CL1</b> | chemokine (C-X3-C motif) ligand 1                                         | 2   | 12   | 7   | 4  | Bt.1275.1.S1_at  | cytokine                |
| GOLGA4        | golgi autoantigen, golgin subfamily a, 4                                  | 4   | 11   | 10  | 3  | Bt.19349.1.A1_at | other                   |
| <b>IL1B</b>   | interleukin 1, beta                                                       | 3   | 11   | 6   | -  | Bt.4856.1.S2_at  | cytokine                |
| <b>CSF3</b>   | colony stimulating factor 3 (granulocyte)                                 | 3   | 11   | 3   | 3  | Bt.4660.1.S1_at  | cytokine                |
| BACH2         | BTB and CNC homology 1, basic leucine zipper transcription factor 2       | -   | 10   | -   | -  | Bt.20308.1.S1_at | transcription regulator |
| SLCO4A1       | solute carrier organic anion transporter family, member 4A1               | 5   | 10   | -   | 2  | Bt.27240.1.A1_at | transporter             |
| ANGPTL4       | angiopoietin-like 4                                                       | 5   | 9    | 5   | 2  | Bt.4816.1.S1_at  | other                   |
| TIFA          | TRAF-interacting protein with forkhead-associated domain                  | -   | 9    | 4   | -  | Bt.29044.1.S1_at | other                   |
| TRIM16        | tripartite motif-containing 16                                            | -   | 9    | -   | -  | Bt.28116.1.S1_at | transcription regulator |
| <b>CTSC</b>   | cathepsin C                                                               | 4   | 8    | 3   | 3  | Bt.10865.1.S1_at | peptidase               |
| SERPINB2      | serpin peptidase inhibitor, clade B (ovalbumin), member 2                 | -   | 8    | 2   | -  | Bt.13073.1.S1_at | other                   |
| <b>SOCS1</b>  | suppressor of cytokine signaling 1                                        | -   | 8    | -   | -  | Bt.1736.1.A1_at  | other                   |

|                |                                                                                       |   |   |   |   |                    |                            |
|----------------|---------------------------------------------------------------------------------------|---|---|---|---|--------------------|----------------------------|
| PPP1R3C        | protein phosphatase 1, regulatory (inhibitor) subunit 3C                              | 5 | 7 | 7 | 7 | Bt.13484.1.A1_at   | phosphatase                |
| P2RX6          | purinergic receptor P2X, ligand-gated ion channel, 6                                  | - | 7 | 3 | 2 | Bt.16124.2.S1_at   | ion channel                |
| NFKBIE         | nuclear factor of kappa light polypeptide gene enhancer in B-cells inhibitor, epsilon | 3 | 7 | 3 | 3 | Bt.1536.1.A1_at    | transcription regulator    |
| SERPINB1       | serpin peptidase inhibitor, clade B (ovalbumin), member 1                             | 3 | 7 | 6 | 2 | Bt.27909.1.S1_at   | other                      |
| TOP1           | topoisomerase (DNA) I                                                                 | - | 7 | - | - | Bt.17070.1.S1_at   | enzyme                     |
| <b>PTGER2</b>  | prostaglandin E receptor 2 (subtype EP2), 53kDa                                       | - | 6 | 5 | 4 | Bt.12301.1.S1_at   | G-protein coupled receptor |
| PRSS22         | protease, serine, 22                                                                  | - | 6 | - | 2 | Bt.29351.1.A1_at   | peptidase                  |
| DNAJB1         | DnaJ (Hsp40) homolog, subfamily B, member 1                                           | 5 | 6 | 2 | 2 | Bt.28288.1.S1_at   | other                      |
| FBXO33         | F-box protein 33                                                                      | - | 6 | 3 | - | Bt.13844.2.S1_at   | other                      |
| CYP26B1        | cytochrome P450, family 26, subfamily B, polypeptide 1                                | 3 | 6 | - | - | Bt.20507.1.S1_at   | enzyme                     |
| MMP1           | matrix metalloproteinase 1 (interstitial collagenase)                                 | 2 | 6 | 3 | 2 | Bt.72.1.S1_at      | peptidase                  |
| RNF19B         | ring finger protein 19B                                                               | 2 | 6 | 2 | - | Bt.15692.1.A1_at   | other                      |
| <b>RELB</b>    | v-rel reticuloendotheliosis viral oncogene homolog B                                  | 2 | 6 | 3 | 3 | Bt.17669.1.S1_a_at | transcription regulator    |
| <b>NFKB1</b>   | nuclear factor of kappa light polypeptide gene enhancer in B-cells 1                  | - | 6 | 3 | 2 | Bt.9309.1.A1_at    | transcription regulator    |
| <b>TNFAIP6</b> | tumor necrosis factor, alpha-induced protein 6                                        | - | 5 | 2 | - | Bt.958.1.A1_at     | other                      |
| JARID2         | jumonji, AT rich interactive domain 2                                                 | - | 5 | - | - | Bt.7008.1.S1_at    | transcription regulator    |
| ABTB2          | ankyrin repeat and BTB (POZ) domain containing 2                                      | - | 5 | - | - | Bt.26223.1.S1_at   | other                      |
| <b>IRF9</b>    | interferon regulatory factor 9                                                        | - | 5 | 4 | 2 | Bt.20054.1.S1_at   | transcription regulator    |
| MYB            | v-myb myeloblastosis viral oncogene homolog (avian)                                   | - | 5 | - | - | Bt.12781.1.S1_at   | transcription regulator    |
| <b>FAS</b>     | Fas (TNF receptor superfamily, member 6)                                              | - | 5 | - | - | Bt.4345.1.S1_at    | transmembrane receptor     |
| <b>BCL3</b>    | B-cell CLL/lymphoma 3                                                                 | 2 | 5 | - | - | Bt.16930.1.A1_at   | transcription regulator    |
| MAFF           | v-maf musculoaponeurotic fibrosarcoma oncogene homolog F (avian)                      | 5 | 5 | 2 | 2 | Bt.7142.1.S1_at    | transcription regulator    |
| <b>CFLAR</b>   | CASP8 and FADD-like apoptosis regulator                                               | - | 5 | 3 | - | Bt.18643.2.S1_at   | other                      |
| N4BP1          | NEDD4 binding protein 1                                                               | - | 5 | 3 | - | Bt.20548.1.S1_at   | other                      |
| CDC42EP2       | CDC42 effector protein (Rho GTPase binding) 2                                         | - | 5 | - | 2 | Bt.20259.1.S1_at   | other                      |
| GARNL4         | GTPase activating Rap/RanGAP domain-like 4                                            | - | 5 | - | - | Bt.22849.1.S1_at   | other                      |
| LPO            | lactoperoxidase                                                                       | - | 5 | 4 | - | Bt.4784.1.S1_at    | enzyme                     |
| IPMK           | inositol polyphosphate multikinase                                                    | - | 5 | 2 | - | Bt.25055.1.A1_at   | kinase                     |
| BPIL2          | bactericidal/permeability-increasing protein-like 2                                   | - | 4 | 2 | 2 | Bt.16124.1.A1_at   | transporter                |
| GBP5           | guanylate binding protein 5                                                           | - | 4 | 2 | - | Bt.16350.1.S1_at   | enzyme                     |
| SLC25A28       | solute carrier family 25, member 28                                                   | - | 4 | 3 | - | Bt.20517.1.S1_at   | other                      |
| PARP8          | poly (ADP-ribose) polymerase family, member 8                                         | - | 4 | - | - | Bt.27957.1.A1_at   | other                      |
| IFNAR2         | interferon (alpha, beta and omega) receptor 2                                         | - | 4 | 3 | 2 | Bt.5508.1.S1_at    | transmembrane receptor     |
| KLF4           | Kruppel-like factor 4 (gut)                                                           | 4 | 4 | - | - | Bt.1424.1.S1_at    | transcription regulator    |
| <b>CEBPD</b>   | CCAAT/enhancer binding protein (C/EBP), delta                                         | 3 | 4 | 2 | 2 | Bt.6406.1.S3_at    | transcription regulator    |
| <b>PLAT</b>    | plasminogen activator, tissue                                                         | - | 4 | 3 | - | Bt.12302.1.S1_at   | peptidase                  |
| IFIT5          | interferon-induced protein with tetratricopeptide repeats 5                           | - | 4 | 4 | - | Bt.22130.1.S1_at   | other                      |
| <b>ITGA2</b>   | integrin, alpha 2 (CD49B, alpha 2 subunit of VLA-2 receptor)                          | - | 4 | - | - | Bt.12761.1.A1_at   | other                      |
| TRIB2          | tribbles homolog 2 (Drosophila)                                                       | 3 | 4 | - | - | Bt.22857.1.S2_at   | kinase                     |
| <b>CIITA</b>   | class II, major histocompatibility complex, transactivator                            | - | 4 | - | - | Bt.24665.1.S1_at   | transcription regulator    |
| RNF144B        | ring finger protein 144B                                                              | - | 4 | - | - | Bt.6796.1.A1_at    | enzyme                     |
| PPAP2B         | phosphatidic acid phosphatase type 2B                                                 | - | 4 | 3 | 3 | Bt.23509.1.S1_at   | phosphatase                |
| L2HGDH         | L-2-hydroxyglutarate dehydrogenase                                                    | - | 4 | - | - | Bt.26150.1.A1_at   | enzyme                     |
| MARCKSL1       | MARCKS-like 1                                                                         | - | 4 | 3 | - | Bt.3880.1.S1_at    | other                      |
| <b>CASP3</b>   | caspase 3, apoptosis-related cysteine peptidase                                       | - | 3 | 3 | - | Bt.29166.1.S1_at   | peptidase                  |
| <b>F2R</b>     | coagulation factor II (thrombin) receptor                                             | - | 3 | - | - | Bt.10814.1.S1_at   | G-protein coupled receptor |
| RASSF1         | Ras association (RalGDS/AF-6) domain family member 1                                  | - | 3 | - | - | Bt.20366.1.S1_at   | other                      |
| FRK            | fyn-related kinase                                                                    | - | 3 | 2 | 2 | Bt.27815.1.S1_at   | kinase                     |
| DOT1L          | DOT1-like, histone H3 methyltransferase (S. cerevisiae)                               | - | 3 | - | - | Bt.26580.1.A1_at   | phosphatase                |
| HIVEP2         | human immunodeficiency virus type I enhancer binding protein 2                        | - | 3 | - | - | Bt.8012.1.S1_at    | transcription regulator    |
| RGS16          | regulator of G-protein signaling 16                                                   | - | 3 | - | - | Bt.26612.2.S1_at   | other                      |

|               |                                                                                                                  |   |   |   |   |                    |                                   |
|---------------|------------------------------------------------------------------------------------------------------------------|---|---|---|---|--------------------|-----------------------------------|
| <b>PIK3R5</b> | phosphoinositide-3-kinase, regulatory subunit 5                                                                  | - | 3 | 3 | 2 | Bt.24675.1.S1_at   | kinase                            |
| GRK5          | G protein-coupled receptor kinase 5                                                                              | - | 3 | - | - | Bt.4263.1.S1_at    | kinase                            |
| <b>TLR4</b>   | toll-like receptor 4                                                                                             | - | 3 | - | - | Bt.9030.1.S1_at    | transmembrane receptor            |
| <b>ABCB4</b>  | ATP-binding cassette, sub-family B (MDR/TAP), member 4                                                           | - | 3 | 2 | - | Bt.15958.2.A1_a_at | transporter                       |
| <b>ETS1</b>   | v-ets erythroblastosis virus E26 oncogene homolog 1 (avian)                                                      | - | 3 | - | - | Bt.12712.3.S1_at   | transcription regulator           |
| <b>IL1RAP</b> | interleukin 1 receptor accessory protein                                                                         | - | 3 | 2 | - | Bt.28708.1.S1_at   | transmembrane receptor            |
| NRP2          | neuropilin 2                                                                                                     | - | 3 | - | - | Bt.8308.1.A1_at    | kinase                            |
| MOCS2         | molybdenum cofactor synthesis 2                                                                                  | - | 3 | - | - | Bt.24978.1.A1_at   | enzyme                            |
| TFPI2         | tissue factor pathway inhibitor 2                                                                                | - | 3 | 3 | - | Bt.2017.1.S1_at    | other                             |
| RNF41         | ring finger protein 41                                                                                           | - | 3 | - | - | Bt.4930.1.S1_at    | other                             |
| GFPT2         | glutamine-fructose-6-phosphate transaminase 2                                                                    | - | 3 | - | - | Bt.8781.1.S1_at    | enzyme                            |
| <b>PTPN1</b>  | protein tyrosine phosphatase, non-receptor type 1                                                                | - | 3 | - | - | Bt.9542.1.S1_at    | phosphatase                       |
| MBOAT1        | membrane bound O-acyltransferase domain containing 1                                                             | - | 3 | 2 | - | Bt.20276.2.A1_at   | other                             |
| FLVCR2        | feline leukemia virus subgroup C cellular receptor family, member 2                                              | - | 3 | - | - | Bt.24526.1.S1_at   | transporter                       |
| <b>PLAUR</b>  | plasminogen activator, urokinase receptor                                                                        | - | 3 | - | - | Bt.1942.1.S1_at    | transmembrane receptor            |
| <b>TRAF3</b>  | TNF receptor-associated factor 3                                                                                 | - | 3 | 3 | 2 | Bt.19809.1.S1_at   | other                             |
| <b>IL6ST</b>  | interleukin 6 signal transducer (gp130, oncostatin M receptor)                                                   | - | 3 | - | - | Bt.13719.1.S1_at   | transmembrane receptor            |
| NR4A3         | nuclear receptor subfamily 4, group A, member 3                                                                  | - | 3 | 2 | - | Bt.17173.1.A1_at   | ligand-dependent nuclear receptor |
| AMPD2         | adenosine monophosphate deaminase 2 (isoform L)                                                                  | - | 3 | - | - | Bt.15751.1.S1_at   | enzyme                            |
| DENND5A       | DENN/MADD domain containing 5A                                                                                   | - | 3 | - | - | Bt.5406.1.S1_at    | other                             |
| SEMA4B        | sema domain, immunoglobulin domain (Ig), transmembrane domain (TM) and short cytoplasmic domain, (semaphorin) 4E | - | 3 | - | - | Bt.26671.1.S1_at   | other                             |
| <b>ICOSLG</b> | inducible T-cell co-stimulator ligand                                                                            | - | 3 | 2 | - | Bt.26695.2.A1_at   | other                             |
| NCOA7         | nuclear receptor coactivator 7                                                                                   | - | 3 | - | - | Bt.28087.1.S1_at   | other                             |
| HS3ST3B1      | heparan sulfate (glucosamine) 3-O-sulfotransferase 3B1                                                           | - | 3 | 2 | - | Bt.14272.1.A1_at   | enzyme                            |
| ANTXR2        | anthrax toxin receptor 2                                                                                         | - | 3 | - | - | Bt.23438.1.S1_at   | other                             |
| GCLC          | glutamate-cysteine ligase, catalytic subunit                                                                     | - | 2 | - | - | Bt.16068.1.A1_at   | enzyme                            |
| TTC9          | tetratricopeptide repeat domain 9                                                                                | - | 2 | - | 2 | Bt.23283.1.S1_at   | other                             |
| <b>VEGFA</b>  | vascular endothelial growth factor A                                                                             | - | 2 | 2 | - | Bt.4138.1.S1_a_at  | growth factor                     |
| SGSM2         | small G protein signaling modulator 2                                                                            | - | 2 | - | - | Bt.18576.1.S1_at   | other                             |
| DCLK1         | doublecortin-like kinase 1                                                                                       | - | 2 | 2 | - | Bt.19199.1.A1_at   | kinase                            |
| PVR           | poliovirus receptor                                                                                              | - | 2 | - | - | Bt.15798.1.S1_at   | transmembrane receptor            |
| SERTAD1       | SERTA domain containing 1                                                                                        | - | 2 | - | - | Bt.5828.1.S1_at    | transcription regulator           |
| <b>PTGS1</b>  | prostaglandin-endoperoxide synthase 1 (prostaglandin G/H synthase and cyclooxygenase)                            | - | 2 | 2 | - | Bt.2151.1.S1_at    | enzyme                            |
| CREB1         | cAMP responsive element binding protein 1                                                                        | - | 2 | - | - | Bt.4183.1.S1_at    | transcription regulator           |
| NOV           | nephroblastoma overexpressed gene                                                                                | - | 2 | - | - | Bt.13482.2.S1_at   | growth factor                     |
| ARHGEF2       | rho/rac guanine nucleotide exchange factor (GEF) 2                                                               | - | 2 | - | - | Bt.17672.1.S1_at   | other                             |
| NHSL1         | NHS-like 1                                                                                                       | - | 2 | - | - | Bt.13492.1.S1_at   | other                             |
| SMURF2        | SMAD specific E3 ubiquitin protein ligase 2                                                                      | - | 2 | - | - | Bt.28632.2.S1_at   | enzyme                            |
| DAXX          | death-domain associated protein                                                                                  | - | 2 | - | - | Bt.20069.1.S1_at   | transcription regulator           |
| <b>SBNO2</b>  | strawberry notch homolog 2 (Drosophila)                                                                          | - | 2 | - | - | Bt.10014.1.S1_at   | other                             |
| RNF144A       | ring finger protein 144A                                                                                         | - | 2 | 2 | - | Bt.26501.1.S1_at   | other                             |
| ABCB1         | ATP-binding cassette, sub-family B (MDR/TAP), member 1                                                           | - | 2 | - | - | Bt.29740.1.S1_at   | transporter                       |
| SPTLC2        | serine palmitoyltransferase, long chain base subunit 2                                                           | - | 2 | - | - | Bt.29178.1.S1_at   | enzyme                            |
| <b>SELE</b>   | selectin E                                                                                                       | - | 2 | - | - | Bt.197.1.S1_at     | other                             |
| <b>IL4R</b>   | interleukin 4 receptor                                                                                           | - | 2 | - | - | Bt.24531.1.S1_at   | transmembrane receptor            |
| SSH2          | slingshot homolog 2 (Drosophila)                                                                                 | - | 2 | - | - | Bt.29928.1.S1_at   | phosphatase                       |
| AGPAT4        | 1-acylglycerol-3-phosphate O-acyltransferase 4 (lysophosphatidic acid acyltransferase, delta)                    | - | 2 | - | - | Bt.25871.1.A1_at   | enzyme                            |
| HAS2          | hyaluronan synthase 2                                                                                            | - | 2 | - | - | Bt.12927.1.S1_at   | enzyme                            |
| PPTC7         | PTC7 protein phosphatase homolog (S. cerevisiae)                                                                 | - | 2 | - | - | Bt.11791.2.S1_at   | phosphatase                       |
| PTH1H         | parathyroid hormone-like hormone                                                                                 | - | 2 | - | - | Bt.12848.1.S1_at   | other                             |
| LAMB3         | laminin, beta 3                                                                                                  | - | 2 | - | - | Bt.16740.1.A1_at   | transporter                       |

|               |                                                                                          |   |    |   |    |                    |                            |
|---------------|------------------------------------------------------------------------------------------|---|----|---|----|--------------------|----------------------------|
| TXNL4B        | thioredoxin-like 4B                                                                      | - | 2  | - | -  | Bt.20128.1.A1_at   | enzyme                     |
| ZFP36L2       | zinc finger protein 36, C3H type-like 2                                                  | - | 2  | - | -  | Bt.19706.1.S1_at   | transcription regulator    |
| <b>F2RL1</b>  | coagulation factor II (thrombin) receptor-like 1                                         | - | 2  | - | -  | Bt.28745.1.S1_at   | G-protein coupled receptor |
| FOXA1         | forkhead box A1                                                                          | - | 2  | - | -  | Bt.20832.1.S1_at   | transcription regulator    |
| NRG1          | neuregulin 1                                                                             | - | 2  | - | -  | Bt.27974.1.S1_at   | growth factor              |
| SOX7          | SRY (sex determining region Y)-box 7                                                     | - | 2  | - | -  | Bt.22077.1.S1_at   | transcription regulator    |
| USP37         | ubiquitin specific peptidase 37                                                          | - | 2  | - | -  | Bt.29830.1.S1_at   | peptidase                  |
| TGIF1         | TGFB-induced factor homeobox 1                                                           | - | 2  | - | -  | Bt.16329.1.A1_at   | transcription regulator    |
| <b>SOCS3</b>  | suppressor of cytokine signaling 3                                                       | - | 2  | - | -  | Bt.8137.1.S2_at    | other                      |
| CDK6          | cyclin-dependent kinase 6                                                                | - | 2  | - | -  | Bt.25462.1.S1_at   | kinase                     |
| ZC3HAV1       | zinc finger CCCH-type, antiviral 1                                                       | - | 2  | - | -  | Bt.15529.1.S1_at   | other                      |
| RHEBL1        | Ras homolog enriched in brain like 1                                                     | - | 2  | - | -  | Bt.22959.1.S1_at   | enzyme                     |
| SAMHD1        | SAM domain and HD domain 1                                                               | - | 2  | - | -  | Bt.942.2.S1_at     | enzyme                     |
| FUT1          | fucosyltransferase 1 (galactoside 2-alpha-L-fucosyltransferase, H blood group)           | - | 2  | - | -  | Bt.16029.1.S2_at   | enzyme                     |
| PEL1          | pellino homolog 1 (Drosophila)                                                           | - | 2  | - | -  | Bt.16606.1.A1_at   | other                      |
| <b>CYLD</b>   | cylindromatosis (turban tumor syndrome)                                                  | - | 2  | - | -  | Bt.27817.1.S1_at   | transcription regulator    |
| C20ORF117     | chromosome 20 open reading frame 117                                                     | - | 2  | - | -  | Bt.942.1.S1_at     | other                      |
| <b>IFNAR1</b> | interferon (alpha, beta and omega) receptor 1                                            | - | 2  | - | -  | Bt.22665.1.S1_at   | transmembrane receptor     |
| GMEB1         | glucocorticoid modulatory element binding protein 1                                      | - | 2  | - | -  | Bt.29088.1.A1_at   | transcription regulator    |
| BNIP1         | BCL2/adenovirus E1B 19kD interacting protein like                                        | - | 2  | - | -  | Bt.14665.1.A1_at   | other                      |
| <b>NFKB1</b>  | nuclear factor of kappa light polypeptide gene enhancer in B-cells inhibitor, beta       | - | 2  | 2 | -  | Bt.20178.1.S1_at   | transcription regulator    |
| RBBP6         | retinoblastoma binding protein 6                                                         | - | 2  | - | -  | Bt.20304.1.S1_at   | other                      |
| DUSP7         | dual specificity phosphatase 7                                                           | - | 2  | - | -  | Bt.3312.1.S1_at    | phosphatase                |
| SEC14L1       | SEC14-like 1 (S. cerevisiae)                                                             | - | 2  | - | -  | Bt.21705.1.S1_at   | transporter                |
| <b>ITGB6</b>  | integrin, beta 6                                                                         | - | 2  | - | -  | Bt.9972.1.S1_at    | other                      |
| NLK           | nemo-like kinase                                                                         | - | 2  | - | -  | Bt.19762.1.A1_at   | kinase                     |
| SQSTM1        | sequestosome 1                                                                           | - | 2  | - | -  | Bt.28031.1.S1_s_at | transcription regulator    |
| TBXAS1        | thromboxane A synthase 1 (platelet)                                                      | - | -2 | - | -  | Bt.22339.1.A1_at   | enzyme                     |
| REV3L         | REV3-like, catalytic subunit of DNA polymerase zeta (yeast)                              | - | -2 | - | -  | Bt.25319.1.A1_at   | enzyme                     |
| TGFB1         | transforming growth factor, beta receptor 1                                              | - | -2 | - | -  | Bt.28.1.S1_at      | kinase                     |
| SLC16A4       | solute carrier family 16, member 4 (monocarboxylic acid transporter 5)                   | - | -2 | - | -2 | Bt.22085.1.S1_at   | transporter                |
| ADSS          | adenylosuccinate synthase                                                                | - | -2 | - | -  | Bt.24907.1.A1_at   | enzyme                     |
| HSPBAP1       | HSPB (heat shock 27kDa) associated protein 1                                             | - | -2 | - | -  | Bt.14384.1.A1_at   | other                      |
| LGR4          | leucine-rich repeat-containing G protein-coupled receptor 4                              | - | -2 | - | -  | Bt.17591.2.S1_at   | G-protein coupled receptor |
| WDR44         | WD repeat domain 44                                                                      | - | -2 | - | -  | Bt.216.1.S1_at     | other                      |
| ARMCX1        | armadillo repeat containing, X-linked 1                                                  | - | -2 | - | -  | Bt.3216.1.A1_at    | other                      |
| <b>GCNT1</b>  | glucosaminyl (N-acetyl) transferase 1, core 2 (beta-1,6-N-acetylglucosaminyltransferase) | - | -2 | - | -  | Bt.17542.1.S1_at   | enzyme                     |
| <b>EDNRA</b>  | endothelin receptor type A                                                               | - | -2 | - | -  | Bt.25346.1.A1_at   | transmembrane receptor     |
| C10ORF78      | chromosome 10 open reading frame 78                                                      | - | -2 | - | -  | Bt.23566.2.S1_at   | other                      |
| G2E3          | G2/M-phase specific E3 ubiquitin ligase                                                  | - | -2 | - | -  | Bt.19681.1.A1_at   | enzyme                     |
| RNF7          | ring finger protein 7                                                                    | - | -2 | - | -  | Bt.1461.1.S1_at    | other                      |
| ZBTB6         | zinc finger and BTB domain containing 6                                                  | - | -2 | - | -  | Bt.16845.1.A1_at   | other                      |
| HOXA10        | homeobox A10                                                                             | - | -2 | - | -  | Bt.21093.1.S1_at   | transcription regulator    |
| <b>HDAC7</b>  | histone deacetylase 7                                                                    | - | -2 | - | -  | Bt.2919.1.S1_a_at  | transcription regulator    |
| SOX4          | SRY (sex determining region Y)-box 4                                                     | - | -2 | - | -  | Bt.12453.1.A1_at   | transcription regulator    |
| DUSP19        | dual specificity phosphatase 19                                                          | - | -2 | - | -  | Bt.25075.1.A1_at   | phosphatase                |
| TNS3          | tensin 3                                                                                 | - | -2 | - | -  | Bt.2399.1.S1_at    | phosphatase                |
| ASXL1         | additional sex combs like 1 (Drosophila)                                                 | - | -2 | - | -  | Bt.10734.1.A1_at   | other                      |
| LRRC2         | leucine rich repeat containing 2                                                         | - | -2 | - | -  | Bt.22167.2.A1_at   | other                      |
| LPP           | LIM domain containing preferred translocation partner in lipoma                          | - | -2 | - | -  | Bt.26804.1.S1_at   | other                      |
| NIPA2         | non imprinted in Prader-Willi/Angelman syndrome 2                                        | - | -2 | - | -  | Bt.25076.1.A1_at   | other                      |

|               |                                                                                 |    |    |    |    |                  |                                   |
|---------------|---------------------------------------------------------------------------------|----|----|----|----|------------------|-----------------------------------|
| IQCB1         | IQ motif containing B1                                                          | -  | -2 | -  | -  | Bt.20448.1.S1_at | other                             |
| UNG           | uracil-DNA glycosylase                                                          | -  | -2 | -  | -  | Bt.11128.1.S1_at | enzyme                            |
| <b>HPRT1</b>  | hypoxanthine phosphoribosyltransferase 1                                        | -  | -2 | -  | -  | Bt.16309.1.S1_at | enzyme                            |
| JPH1          | junctionophilin 1                                                               | -  | -2 | -  | -  | Bt.16236.1.A1_at | other                             |
| <b>CBLB</b>   | Cas-Br-M (murine) ecotropic retroviral transforming sequence b                  | -  | -2 | -  | -  | Bt.21203.1.S1_at | other                             |
| PYGO1         | pygopus homolog 1 (Drosophila)                                                  | -  | -2 | -  | -  | Bt.16784.1.S1_at | other                             |
| HSPA2         | heat shock 70kDa protein 2                                                      | -  | -2 | -  | -  | Bt.19759.1.S1_at | other                             |
| DLC1          | deleted in liver cancer 1                                                       | -  | -2 | -  | -  | Bt.24236.1.S1_at | other                             |
| RNF39         | ring finger protein 39                                                          | -  | -2 | -  | -  | Bt.17673.1.A1_at | other                             |
| B3GNT6        | UDP-GlcNAc:betaGal beta-1,3-N-acetylglucosaminyltransferase 6 (core 3 synthase) | -  | -2 | -  | -  | Bt.24552.1.S1_at | enzyme                            |
| CALD1         | caldesmon 1                                                                     | -  | -2 | -  | -  | Bt.21294.1.A1_at | other                             |
| ELF5          | E74-like factor 5 (ets domain transcription factor)                             | -  | -2 | -  | -  | Bt.12819.1.S1_at | transcription regulator           |
| FBXL4         | F-box and leucine-rich repeat protein 4                                         | -  | -2 | -  | -  | Bt.21681.1.A1_at | other                             |
| GLIS2         | GLIS family zinc finger 2                                                       | -  | -2 | -  | -  | Bt.27617.1.S1_at | transcription regulator           |
| ATXN7L1       | ataxin 7-like 1                                                                 | -  | -2 | -  | -  | Bt.19100.1.A1_at | other                             |
| PPP2R1B       | protein phosphatase 2 (formerly 2A), regulatory subunit A, beta isoform         | -  | -2 | -  | -  | Bt.6321.1.S1_at  | phosphatase                       |
| <b>MAPK14</b> | mitogen-activated protein kinase 14                                             | -  | -2 | -  | -  | Bt.18473.1.S1_at | kinase                            |
| RUNX2         | runt-related transcription factor 2                                             | -  | -2 | -  | -  | Bt.19978.1.A1_at | transcription regulator           |
| GATA2         | GATA binding protein 2                                                          | -  | -2 | -  | -  | Bt.6408.2.A1_at  | transcription regulator           |
| TFB1M         | transcription factor B1, mitochondrial                                          | -  | -2 | -  | -  | Bt.9999.2.A1_at  | transcription regulator           |
| CDC6          | cell division cycle 6 homolog (S. cerevisiae)                                   | -  | -2 | -2 | -2 | Bt.24218.1.S1_at | other                             |
| NR2F1         | nuclear receptor subfamily 2, group F, member 1                                 | -  | -2 | -  | -  | Bt.543.1.S1_at   | ligand-dependent nuclear receptor |
| RMND1         | required for meiotic nuclear division 1 homolog (S. cerevisiae)                 | -  | -3 | -  | -  | Bt.16231.1.S1_at | other                             |
| TRPS1         | trichorhinophalangeal syndrome I                                                | -  | -3 | -  | -  | Bt.8793.1.S1_at  | transcription regulator           |
| FANCM         | Fanconi anemia, complementation group M                                         | -  | -3 | -  | -  | Bt.21150.1.A1_at | enzyme                            |
| TJP3          | tight junction protein 3 (zona occludens 3)                                     | -  | -3 | -  | -  | Bt.8484.1.S1_at  | other                             |
| CYP2U1        | cytochrome P450, family 2, subfamily U, polypeptide 1                           | -  | -3 | -  | -  | Bt.28113.1.S1_at | enzyme                            |
| PMS1          | PMS1 postmeiotic segregation increased 1 (S. cerevisiae)                        | -  | -3 | -  | -  | Bt.20671.1.A1_at | other                             |
| CDCA7         | cell division cycle associated 7                                                | -  | -3 | -  | -  | Bt.6441.1.S1_at  | other                             |
| BAHD1         | bromo adjacent homology domain containing 1                                     | -  | -3 | -  | -  | Bt.21388.2.A1_at | other                             |
| NAP1L5        | nucleosome assembly protein 1-like 5                                            | -  | -3 | -3 | -  | Bt.24901.1.A1_at | other                             |
| FAM46B        | family with sequence similarity 46, member B                                    | -  | -3 | -  | -  | Bt.6658.2.A1_at  | other                             |
| IL17RD        | interleukin 17 receptor D                                                       | -  | -3 | -  | -  | Bt.20936.1.S1_at | other                             |
| ZNF271        | zinc finger protein 271                                                         | -2 | -3 | -  | -  | Bt.2850.1.A1_at  | other                             |
| CTTNBP2       | cortactin binding protein 2                                                     | -  | -3 | -3 | -  | Bt.25352.1.A1_at | other                             |
| KLF11         | Kruppel-like factor 11                                                          | -  | -3 | -  | -  | Bt.16916.1.S1_at | transcription regulator           |
| ZNF608        | zinc finger protein 608                                                         | -  | -3 | -  | -  | Bt.18479.1.A1_at | other                             |
| RHOBTB1       | Rho-related BTB domain containing 1                                             | -  | -3 | -  | -  | Bt.26483.1.A1_at | enzyme                            |
| ZNF238        | zinc finger protein 238                                                         | -  | -3 | -  | -  | Bt.15860.1.S1_at | transcription regulator           |
| CLDN3         | claudin 3                                                                       | -  | -3 | -2 | -  | Bt.6074.1.S1_at  | transmembrane receptor            |
| GPAM          | glycerol-3-phosphate acyltransferase, mitochondrial                             | -  | -3 | -  | -  | Bt.29570.1.S1_at | enzyme                            |
| OVOL2         | ovo-like 2 (Drosophila)                                                         | -  | -3 | -3 | -  | Bt.14034.1.A1_at | transcription regulator           |
| PDK4          | pyruvate dehydrogenase kinase, isozyme 4                                        | -  | -3 | -  | -  | Bt.23505.1.S1_at | kinase                            |
| AMIGO2        | adhesion molecule with Ig-like domain 2                                         | -  | -3 | -  | -  | Bt.12294.2.A1_at | other                             |
| CCNE2         | cyclin E2                                                                       | -  | -3 | -  | -  | Bt.16141.1.S1_at | other                             |
| FZD2          | frizzled homolog 2 (Drosophila)                                                 | -  | -3 | -  | -  | Bt.16951.1.A1_at | G-protein coupled receptor        |
| <b>ANKRD1</b> | ankyrin repeat domain 1 (cardiac muscle)                                        | -  | -3 | -  | -  | Bt.15836.2.S1_at | transcription regulator           |
| BCOR          | BCL6 co-repressor                                                               | -  | -3 | -  | -  | Bt.17758.2.A1_at | transcription regulator           |
| KANK2         | KN motif and ankyrin repeat domains 2                                           | -  | -3 | -  | -  | Bt.7727.1.S1_at  | transcription regulator           |
| PANK1         | pantothenate kinase 1                                                           | -  | -3 | -  | -  | Bt.21500.1.A1_at | kinase                            |
| PRICKLE1      | prickle homolog 1 (Drosophila)                                                  | -  | -3 | -3 | -2 | Bt.18126.1.A1_at | other                             |

|             |                                                                                                   |    |    |    |    |                  |                        |
|-------------|---------------------------------------------------------------------------------------------------|----|----|----|----|------------------|------------------------|
| PPM1K       | protein phosphatase 1K (PP2C domain containing)                                                   | -  | -4 | -  | -  | Bt.28238.1.A1_at | phosphatase            |
| <b>CFTR</b> | cystic fibrosis transmembrane conductance regulator (ATP-binding cassette sub-family C, member 7) | -2 | -4 | -2 | -  | Bt.19505.1.A1_at | ion channel            |
| ORC5L       | origin recognition complex, subunit 5-like (yeast)                                                | -  | -4 | -3 | -2 | Bt.12135.1.S1_at | other                  |
| PHF17       | PHD finger protein 17                                                                             | -  | -5 | -  | -  | Bt.12417.1.S1_at | other                  |
| UTRN        | utrophin                                                                                          | -  | -5 | -  | -  | Bt.19217.1.A1_at | transmembrane receptor |
| RASL11B     | RAS-like, family 11, member B                                                                     | -  | -5 | -  | -  | Bt.1974.1.S1_at  | enzyme                 |
| LRIG3       | leucine-rich repeats and immunoglobulin-like domains 3                                            | -  | -5 | -  | -  | Bt.22664.1.A1_at | other                  |
| CLDN23      | claudin 23                                                                                        | -  | -6 | -2 | -2 | Bt.27959.1.S1_at | other                  |

#### Maximum regulated 6 h after stimulation

|                 |                                                                               |   |     |     |     |                   |                         |
|-----------------|-------------------------------------------------------------------------------|---|-----|-----|-----|-------------------|-------------------------|
| <b>CCL5</b>     | chemokine (C-C motif) ligand 5                                                | 7 | 134 | 175 | 106 | Bt.552.1.S1_at    | cytokine                |
| RTP4            | receptor (chemosensory) transporter protein 4                                 | - | 17  | 45  | 13  | Bt.24813.1.A1_at  | other                   |
| <b>MX2</b>      | myxovirus (influenza virus) resistance 2                                      | - | 18  | 43  | 17  | Bt.8143.1.S1_at   | enzyme                  |
| <b>ISG15</b>    | ISG15 ubiquitin-like modifier                                                 | 2 | 20  | 28  | 10  | Bt.12304.1.S1_at  | other                   |
| <b>S100A9</b>   | S100 calcium binding protein A9                                               | - | 19  | 26  | 24  | Bt.16201.1.S1_at  | other                   |
| <b>IFI44L</b>   | interferon-induced protein 44-like                                            | - | 6   | 22  | 8   | Bt.19620.1.A1_at  | other                   |
| <b>MX1</b>      | myxovirus (influenza virus) resistance 1                                      | - | 11  | 20  | 8   | Bt.4675.1.S1_a_at | enzyme                  |
| <b>IFI44</b>    | interferon-induced protein 44                                                 | - | 4   | 20  | 7   | Bt.20785.1.A1_at  | other                   |
| <b>GBP2</b>     | guanylate binding protein 2, interferon-inducible                             | - | 9   | 19  | 6   | Bt.25303.1.A1_at  | enzyme                  |
| <b>OAS1</b>     | 2',5'-oligoadenylate synthetase 1                                             | - | 10  | 18  | 6   | Bt.20891.1.S1_at  | enzyme                  |
| <b>MMP9</b>     | matrix metalloproteinase 9                                                    | - | 9   | 17  | 12  | Bt.4714.1.S1_at   | peptidase               |
| EIF4E           | eukaryotic translation initiation factor 4E                                   | - | 12  | 14  | 4   | Bt.17195.1.A1_at  | translation regulator   |
| <b>HIF1A</b>    | hypoxia inducible factor 1, alpha subunit                                     | - | -   | 12  | 11  | Bt.25110.1.A1_at  | transcription regulator |
| <b>TNFSF13B</b> | tumor necrosis factor (ligand) superfamily, member 13b                        | - | 6   | 12  | 3   | Bt.24855.2.S1_at  | cytokine                |
| <b>IFIH1</b>    | interferon induced with helicase C domain 1                                   | - | 7   | 11  | 4   | Bt.24098.1.A1_at  | enzyme                  |
| USP18           | ubiquitin specific peptidase 18                                               | - | 10  | 11  | 2   | Bt.23233.1.S1_at  | peptidase               |
| <b>CD40</b>     | CD40 molecule, TNF receptor superfamily member 5                              | 2 | 9   | 10  | 4   | Bt.13130.1.S1_at  | transmembrane receptor  |
| <b>DDX58</b>    | DEAD (Asp-Glu-Ala-Asp) box polypeptide 58                                     | - | 4   | 9   | 4   | Bt.24033.1.A1_at  | enzyme                  |
| RNF213          | ring finger protein 213                                                       | - | 4   | 8   | 3   | Bt.9179.1.A1_at   | other                   |
| DYNLT3          | dynein, light chain, Tctex-type 3                                             | - | 4   | 8   | 3   | Bt.22498.1.A1_at  | other                   |
| <b>IKBKE</b>    | inhibitor of kappa light polypeptide gene enhancer in B-cells, kinase epsilon | - | 5   | 8   | 6   | Bt.1472.1.S1_at   | kinase                  |
| IFI16           | interferon, gamma-inducible protein 16                                        | - | 4   | 8   | 3   | Bt.22021.1.S1_at  | transcription regulator |
| <b>ISG20</b>    | interferon stimulated exonuclease gene 20kDa                                  | - | 5   | 7   | 3   | Bt.22275.1.A1_at  | enzyme                  |
| <b>IFI6</b>     | interferon, alpha-inducible protein 6                                         | - | 3   | 7   | 7   | Bt.8436.1.S1_at   | other                   |
| ATP6V0A4        | ATPase, H+ transporting, lysosomal V0 subunit a4                              | - | 4   | 7   | 5   | Bt.22204.1.A1_at  | transporter             |
| STC1            | stanniocalcin 1                                                               | - | -   | 7   | 7   | Bt.7128.1.S1_at   | kinase                  |
| CADPS           | Ca++-dependent secretion activator                                            | - | 3   | 7   | 2   | Bt.16070.1.S1_at  | other                   |
| <b>TNIP1</b>    | TNFAIP3 interacting protein 1                                                 | - | 6   | 6   | 4   | Bt.5432.1.S1_at   | other                   |
| SP100           | SP100 nuclear antigen                                                         | - | 2   | 6   | 2   | Bt.21851.1.A1_at  | transcription regulator |
| SAMD9           | sterile alpha motif domain containing 9                                       | - | 3   | 6   | 2   | Bt.28624.1.S1_at  | other                   |
| SCUBE3          | signal peptide, CUB domain, EGF-like 3                                        | - | 5   | 6   | -   | Bt.19909.1.A1_at  | other                   |
| KLK10           | kallikrein-related peptidase 10                                               | - | 6   | 6   | 3   | Bt.24568.1.A1_at  | peptidase               |
| SLC6A14         | solute carrier family 6 (amino acid transporter), member 14                   | - | 4   | 6   | 4   | Bt.16453.1.A1_at  | transporter             |
| IPCEF1          | interaction protein for cytohesin exchange factors 1                          | - | 2   | 5   | 5   | Bt.24480.1.S1_at  | enzyme                  |
| GBP4            | guanylate binding protein 4                                                   | - | -   | 5   | -   | Bt.18440.3.A1_at  | enzyme                  |
| <b>CD38</b>     | CD38 molecule                                                                 | - | 3   | 5   | 4   | Bt.27365.1.A1_at  | enzyme                  |
| PARP14          | poly (ADP-ribose) polymerase family, member 14                                | - | 3   | 5   | -   | Bt.14676.1.S1_at  | other                   |
| <b>HCK</b>      | hemopoietic cell kinase                                                       | - | 3   | 5   | 4   | Bt.22050.1.S1_at  | kinase                  |
| GBP3            | guanylate binding protein 3                                                   | - | 3   | 5   | 3   | Bt.9296.1.A1_at   | enzyme                  |
| <b>DMBT1</b>    | deleted in malignant brain tumors 1                                           | - | 3   | 5   | 4   | Bt.9632.2.S1_at   | transmembrane receptor  |

|                 |                                                                                              |   |    |   |   |                    |                         |
|-----------------|----------------------------------------------------------------------------------------------|---|----|---|---|--------------------|-------------------------|
| XAF1            | XIAP associated factor 1                                                                     | - | 2  | 5 | 3 | Bt.5259.1.S1_at    | other                   |
| <b>SLC2A3</b>   | solute carrier family 2 (facilitated glucose transporter), member 3                          | - | 2  | 5 | 4 | Bt.3964.1.S1_at    | transporter             |
| UBA7            | ubiquitin-like modifier activating enzyme 7                                                  | - | 2  | 5 | 4 | Bt.2294.1.S1_a_at  | enzyme                  |
| <b>ADM</b>      | adrenomedullin                                                                               | - | -  | 4 | 4 | Bt.2047.1.S1_at    | other                   |
| GBP1            | guanylate binding protein 1, interferon-inducible, 67kDa                                     | - | 3  | 4 | 2 | Bt.24012.1.A1_at   | enzyme                  |
| PLEKHA4         | pleckstrin homology domain containing, family A (phosphoinositide binding specific) member 4 | - | 3  | 4 | - | Bt.26665.1.S1_at   | other                   |
| IGFBP3          | insulin-like growth factor binding protein 3                                                 | - | 3  | 4 | - | Bt.422.1.S2_at     | other                   |
| CASP7           | caspase 7, apoptosis-related cysteine peptidase                                              | - | 3  | 4 | 2 | Bt.28094.1.S1_at   | peptidase               |
| DTX3L           | deltex 3-like (Drosophila)                                                                   | - | 2  | 4 | - | Bt.28523.1.S1_at   | other                   |
| <b>TRIM21</b>   | tripartite motif-containing 21                                                               | - | 3  | 4 | - | Bt.22980.1.S1_at   | other                   |
| <b>CASP4</b>    | caspase 4, apoptosis-related cysteine peptidase                                              | - | 3  | 4 | 3 | Bt.16018.1.S2_at   | peptidase               |
| <b>EIF2AK2</b>  | eukaryotic translation initiation factor 2-alpha kinase 2                                    | - | 3  | 4 | 2 | Bt.20923.1.S1_at   | kinase                  |
| DKK1            | dickkopf homolog 1 (Xenopus laevis)                                                          | - | -2 | 4 | - | Bt.13880.1.S1_at   | growth factor           |
| PARP9           | poly (ADP-ribose) polymerase family, member 9                                                | - | -  | 4 | 2 | Bt.20409.1.S1_at   | other                   |
| ARRDC4          | arrestin domain containing 4                                                                 | - | 3  | 4 | 3 | Bt.9792.1.S1_at    | other                   |
| <b>IRF7</b>     | interferon regulatory factor 7                                                               | - | 2  | 4 | - | Bt.5768.2.S1_at    | transcription regulator |
| TRIM25          | tripartite motif-containing 25                                                               | - | 3  | 4 | 2 | Bt.13869.1.A1_at   | transcription regulator |
| <b>PML</b>      | promyelocytic leukemia                                                                       | - | 3  | 3 | 2 | Bt.12638.1.S1_at   | transcription regulator |
| <b>NFKB2</b>    | nuclear factor of kappa light polypeptide gene enhancer in B-cells 2 (p49/p100)              | - | 3  | 3 | 2 | Bt.20288.1.S1_at   | transcription regulator |
| CYP2J2          | cytochrome P450, family 2, subfamily J, polypeptide 2                                        | - | 2  | 3 | - | Bt.29006.1.S1_at   | enzyme                  |
| TRIM5           | tripartite motif-containing 5                                                                | - | -  | 3 | - | Bt.16983.1.S1_at   | other                   |
| <b>SP140</b>    | SP140 nuclear body protein                                                                   | - | -  | 3 | - | Bt.27830.1.A1_at   | transcription regulator |
| PNPT1           | polyribonucleotide nucleotidyltransferase 1                                                  | - | 2  | 3 | - | Bt.5684.1.S1_at    | enzyme                  |
| TRIM6           | tripartite motif-containing 6                                                                | - | 3  | 3 | - | Bt.14047.1.A1_at   | other                   |
| STAC            | SH3 and cysteine rich domain                                                                 | - | 2  | 3 | 3 | Bt.3547.1.A1_at    | other                   |
| BHLHE41         | basic helix-loop-helix family, member e41                                                    | 2 | 2  | 3 | - | Bt.12583.1.A1_at   | transcription regulator |
| STRA6           | stimulated by retinoic acid gene 6 homolog (mouse)                                           | - | 3  | 3 | - | Bt.3196.1.S1_at    | other                   |
| TDRD7           | tudor domain containing 7                                                                    | - | -  | 3 | - | Bt.25103.1.S1_at   | other                   |
| GTF2B           | general transcription factor IIB                                                             | - | 3  | 3 | 2 | Bt.5540.1.S1_a_at  | transcription regulator |
| <b>CD14</b>     | CD14 molecule                                                                                | - | 2  | 3 | - | Bt.4285.1.S1_at    | transmembrane receptor  |
| COIL            | coilin                                                                                       | - | 3  | 3 | 2 | Bt.9075.1.S1_at    | other                   |
| YPEL2           | yippee-like 2 (Drosophila)                                                                   | - | -  | 3 | 3 | Bt.27887.1.S1_at   | other                   |
| VLDLR           | very low density lipoprotein receptor                                                        | - | -  | 3 | - | Bt.29381.1.S1_at   | transporter             |
| TNNC1           | troponin C type 1 (slow)                                                                     | - | -  | 3 | 2 | Bt.26998.1.A1_s_at | other                   |
| SLC2A6          | solute carrier family 2 (facilitated glucose transporter), member 6                          | - | 3  | 3 | 2 | Bt.25025.1.S1_at   | transporter             |
| CYP7B1          | cytochrome P450, family 7, subfamily B, polypeptide 1                                        | - | -  | 3 | 2 | Bt.19337.1.S1_at   | enzyme                  |
| SLC16A3         | solute carrier family 16, member 3 (monocarboxylic acid transporter 4)                       | - | -  | 3 | - | Bt.24802.2.S1_a_at | transporter             |
| RTP3            | receptor (chemosensory) transporter protein 3                                                | - | 2  | 3 | 3 | Bt.24992.1.S1_at   | other                   |
| PDXK            | pyridoxal (pyridoxine, vitamin B6) kinase                                                    | - | 2  | 3 | 3 | Bt.7641.2.S1_a_at  | kinase                  |
| <b>ABHD2</b>    | abhydrolase domain containing 2                                                              | - | 3  | 3 | - | Bt.27404.1.S1_at   | enzyme                  |
| SVIL            | supervillin                                                                                  | - | 3  | 3 | - | Bt.4329.1.S1_at    | other                   |
| ADAR            | adenosine deaminase, RNA-specific                                                            | - | -  | 3 | - | Bt.23971.1.S1_at   | enzyme                  |
| <b>STAT2</b>    | signal transducer and activator of transcription 2, 113kDa                                   | - | -  | 3 | - | Bt.24492.1.S1_at   | transcription regulator |
| KCTD11          | potassium channel tetramerisation domain containing 11                                       | - | -  | 3 | 3 | Bt.24709.1.S1_at   | other                   |
| HERC6           | hect domain and RLD 6                                                                        | - | -  | 3 | - | Bt.27463.1.A1_at   | enzyme                  |
| GBP6            | guanylate binding protein family, member 6                                                   | - | -  | 3 | - | Bt.18440.1.S1_at   | enzyme                  |
| <b>TNFRSF6B</b> | tumor necrosis factor receptor superfamily, member 6b, decoy                                 | - | -  | 3 | 2 | Bt.27361.1.A1_at   | transmembrane receptor  |
| PHF15           | PHD finger protein 15                                                                        | - | -  | 3 | - | Bt.29894.1.S1_at   | other                   |
| IL15            | interleukin 15                                                                               | - | -  | 3 | - | Bt.17488.1.A1_at   | cytokine                |
| TGFBI           | transforming growth factor, beta-induced, 68kDa                                              | - | 2  | 3 | - | Bt.4670.1.S1_at    | other                   |
| ADFP            | adipose differentiation-related protein                                                      | - | -  | 3 | - | Bt.2568.1.S1_at    | other                   |

|               |                                                                                                     |   |    |    |   |                    |                            |
|---------------|-----------------------------------------------------------------------------------------------------|---|----|----|---|--------------------|----------------------------|
| EHD3          | EH-domain containing 3                                                                              | - | -  | 3  | - | Bt.3273.1.A1_at    | other                      |
| <b>NDRG1</b>  | N-myc downstream regulated 1                                                                        | - | -  | 2  | - | Bt.1537.1.S1_at    | kinase                     |
| <b>FZRL2</b>  | coagulation factor II (thrombin) receptor-like 2                                                    | - | 2  | 2  | 2 | Bt.1345.1.S1_at    | G-protein coupled receptor |
| GUCY1B3       | guanylate cyclase 1, soluble, beta 3                                                                | - | -  | 2  | - | Bt.4394.1.S1_at    | enzyme                     |
| EGLN3         | egl nine homolog 3 (C. elegans)                                                                     | - | -  | 2  | 2 | Bt.23232.1.S1_at   | enzyme                     |
| RNF128        | ring finger protein 128                                                                             | - | -  | 2  | - | Bt.29416.1.A1_at   | enzyme                     |
| BNIP3         | BCL2/adenovirus E1B 19kDa interacting protein 3                                                     | - | -  | 2  | - | Bt.26692.1.S1_a_at | other                      |
| FMNL3         | formin-like 3                                                                                       | - | 2  | 2  | - | Bt.1411.1.S1_at    | other                      |
| SLC25A19      | solute carrier family 25 (mitochondrial thiamine pyrophosphate carrier), member 19                  | - | -  | 2  | - | Bt.22773.1.S1_at   | transporter                |
| NOSTRIN       | nitric oxide synthase trafficker                                                                    | - | -  | 2  | - | Bt.17865.1.A1_at   | transcription regulator    |
| FCHSD2        | FCH and double SH3 domains 2                                                                        | - | -  | 2  | - | Bt.22584.1.A1_at   | other                      |
| <b>LYN</b>    | v-yes-1 Yamaguchi sarcoma viral related oncogene homolog                                            | - | -  | 2  | - | Bt.10831.2.S1_at   | kinase                     |
| <b>TAP1</b>   | transporter 1, ATP-binding cassette, sub-family B (MDR/TAP)                                         | - | -  | 2  | - | Bt.20416.1.S1_at   | transporter                |
| ODZ2          | odz, odd Oz/ten-m homolog 2 (Drosophila)                                                            | - | -  | 2  | - | Bt.25045.1.S1_at   | other                      |
| ANO1          | anoctamin 1, calcium activated chloride channel                                                     | - | 2  | 2  | - | Bt.17928.1.A1_at   | ion channel                |
| IFITM1        | interferon induced transmembrane protein 1 (9-27)                                                   | - | -  | 2  | 2 | Bt.22978.1.S1_a_at | other                      |
| <b>SLC1A3</b> | solute carrier family 1 (glial high affinity glutamate transporter), member 3                       | - | -  | 2  | 2 | Bt.361.1.S1_at     | transporter                |
| PLEKHF1       | pleckstrin homology domain containing, family F (with FYVE domain) member 1                         | - | -  | 2  | - | Bt.2421.1.A1_at    | other                      |
| PARP12        | poly (ADP-ribose) polymerase family, member 12                                                      | - | -  | 2  | - | Bt.18116.2.A1_at   | other                      |
| C10ORF72      | chromosome 10 open reading frame 72                                                                 | - | -  | 2  | 2 | Bt.1938.1.S1_at    | other                      |
| FOXF1         | forkhead box F1                                                                                     | - | -  | 2  | - | Bt.10180.1.A1_at   | transcription regulator    |
| ROBO1         | roundabout, axon guidance receptor, homolog 1 (Drosophila)                                          | - | -  | 2  | 2 | Bt.23672.1.A1_at   | transmembrane receptor     |
| PVRL2         | poliovirus receptor-related 2 (herpesvirus entry mediator B)                                        | - | -  | 2  | - | Bt.4419.1.S1_at    | other                      |
| WNT5A         | wingless-type MMTV integration site family, member 5A                                               | - | -  | 2  | - | Bt.4374.1.S1_at    | other                      |
| TREX1         | three prime repair exonuclease 1                                                                    | - | -  | 2  | - | Bt.7472.1.S1_at    | enzyme                     |
| SEMA6D        | sema domain, transmembrane domain (TM), and cytoplasmic domain, (semaphorin) 6D                     | - | -  | 2  | - | Bt.19862.2.S1_at   | other                      |
| OPTN          | optineurin                                                                                          | - | -  | 2  | 2 | Bt.17777.1.S1_at   | other                      |
| APOL2         | apolipoprotein L, 2                                                                                 | - | -  | 2  | - | Bt.28313.1.S1_at   | other                      |
| SLC34A3       | solute carrier family 34 (sodium phosphate), member 3                                               | - | -  | 2  | - | Bt.21760.1.S1_at   | transporter                |
| RNF114        | ring finger protein 114                                                                             | - | 2  | 2  | - | Bt.760.1.S1_at     | other                      |
| MGP           | matrix Gla protein                                                                                  | - | -  | 2  | - | Bt.3595.1.S1_at    | other                      |
| SAA3P         | serum amyloid A3 pseudogene                                                                         | - | -  | 2  | 2 | Bt.22322.1.S1_at   | other                      |
| TRIM38        | tripartite motif-containing 38                                                                      | - | -  | 2  | - | Bt.27071.1.S1_at   | other                      |
| SLC24A2       | solute carrier family 24 (sodium/potassium/calcium exchanger), member 2                             | - | -  | 2  | - | Bt.28142.1.S1_at   | transporter                |
| TLE4          | transducin-like enhancer of split 4 (E(sp1) homolog, Drosophila)                                    | - | -  | 2  | - | Bt.22413.1.A1_at   | transcription regulator    |
| GDAP2         | ganglioside induced differentiation associated protein 2                                            | - | -  | 2  | - | Bt.18740.1.S1_at   | other                      |
| CAMK1D        | calcium/calmodulin-dependent protein kinase ID                                                      | - | -  | 2  | - | Bt.17491.1.A1_at   | kinase                     |
| PSMF1         | proteasome (prosome, macropain) inhibitor subunit 1 (PI31)                                          | - | -  | 2  | - | Bt.20110.1.S1_at   | other                      |
| DDX24         | DEAD (Asp-Glu-Ala-Asp) box polypeptide 24                                                           | - | -  | 2  | - | Bt.9433.1.S1_at    | enzyme                     |
| DGKI          | diacylglycerol kinase, iota                                                                         | - | -2 | -2 | - | Bt.22642.1.A1_at   | kinase                     |
| MAGEF1        | melanoma antigen family F, 1                                                                        | - | -2 | -2 | - | Bt.6114.1.S1_at    | other                      |
| TM7SF3        | transmembrane 7 superfamily member 3                                                                | - | -  | -2 | - | Bt.22720.2.S1_a_at | other                      |
| TAT           | tyrosine aminotransferase                                                                           | - | -  | -2 | - | Bt.23513.1.S1_at   | enzyme                     |
| MAP2          | microtubule-associated protein 2                                                                    | - | -  | -2 | - | Bt.569.1.S1_at     | other                      |
| PCBD1         | pterin-4 alpha-carbinolamine dehydratase/dimerization cofactor of hepatocyte nuclear factor 1 alpha | - | -  | -2 | - | Bt.23171.2.S1_at   | transcription regulator    |
| AGFG2         | ArfGAP with FG repeats 2                                                                            | - | -  | -2 | - | Bt.7324.1.S1_at    | other                      |
| SORBS1        | sorbin and SH3 domain containing 1                                                                  | - | -  | -2 | - | Bt.13306.1.S1_at   | other                      |
| <b>CNIH</b>   | cornichon homolog (Drosophila)                                                                      | - | -  | -2 | - | Bt.2810.1.A1_at    | other                      |
| H1FX          | H1 histone family, member X                                                                         | - | -  | -2 | - | Bt.1788.1.A1_at    | other                      |
| MBNL3         | muscleblind-like 3 (Drosophila)                                                                     | - | -  | -2 | - | Bt.20823.2.S1_at   | other                      |
| PBX1          | pre-B-cell leukemia homeobox 1                                                                      | - | -  | -2 | - | Bt.28854.1.S1_at   | transcription regulator    |



|             |                                                                 |    |    |    |    |                     |                            |
|-------------|-----------------------------------------------------------------|----|----|----|----|---------------------|----------------------------|
| GPR125      | G protein-coupled receptor 125                                  | -  | -  | -2 | -  | Bt.6298.1.S1_at     | G-protein coupled receptor |
| SLC35F2     | solute carrier family 35, member F2                             | -  | -  | -2 | -2 | Bt.21079.1.A1_at    | other                      |
| SH3BGR2     | SH3 domain binding glutamic acid-rich protein like 2            | -  | -  | -2 | -  | Bt.16036.1.S1_at    | other                      |
| RRM2        | ribonucleotide reductase M2 polypeptide                         | -  | -  | -2 | -2 | Bt.10648.1.S1_at    | enzyme                     |
| UHRF1       | ubiquitin-like with PHD and ring finger domains 1               | -  | -  | -2 | -  | Bt.28379.1.S1_at    | transcription regulator    |
| <b>RHOB</b> | ras homolog gene family, member B                               | -  | -2 | -3 | -2 | Bt.26793.1.S1_at    | enzyme                     |
| ANKRD23     | ankyrin repeat domain 23                                        | -  | -2 | -3 | -2 | Bt.20316.1.S1_at    | other                      |
| HMGB3       | high-mobility group box 3                                       | -  | -  | -3 | -  | Bt.11711.1.A1_at    | other                      |
| HMMR        | hyaluronan-mediated motility receptor (RHAMM)                   | -  | -  | -3 | -  | Bt.12993.1.S1_at    | other                      |
| MTUS1       | mitochondrial tumor suppressor 1                                | -  | -  | -3 | -2 | Bt.8319.3.S1_a_at   | other                      |
| GRIP1       | glutamate receptor interacting protein 1                        | -  | -  | -3 | -  | Bt.27472.1.A1_at    | other                      |
| SIPA1L1     | signal-induced proliferation-associated 1 like 1                | -  | -2 | -4 | -  | Bt.19949.1.A1_at    | other                      |
| FOLR1       | folate receptor 1 (adult)                                       | -2 | -2 | -4 | -  | BtAffx.29968.1.S1_a | transporter                |
| <b>BLNK</b> | B-cell linker                                                   | -  | -  | -5 | -3 | Bt.24520.1.A1_at    | other                      |
| SDPR        | serum deprivation response (phosphatidylserine binding protein) | -  | -2 | -5 | -  | Bt.11055.1.S1_at    | other                      |

#### Maximum regulated 24 h after stimulation

|                  |                                                                                 |           |            |            |            |                   |                            |
|------------------|---------------------------------------------------------------------------------|-----------|------------|------------|------------|-------------------|----------------------------|
| <b>SAA3</b>      | serum amyloid A3                                                                | <b>13</b> | <b>146</b> | <b>299</b> | <b>612</b> | Bt.278.1.S1_at    | other                      |
| <b>DEFB4/LAP</b> | defensin, beta 4                                                                | -         | <b>3</b>   | <b>4</b>   | <b>92</b>  | Bt.571.1.S1_at    | other                      |
| <b>HP</b>        | haptoglobin                                                                     | -         | <b>26</b>  | <b>53</b>  | <b>64</b>  | Bt.12553.1.S1_at  | peptidase                  |
| <b>IL18BP</b>    | interleukin 18 binding protein                                                  | -         | <b>19</b>  | <b>30</b>  | <b>32</b>  | Bt.22116.1.A1_at  | other                      |
| <b>LTF</b>       | lactotransferrin                                                                | -         | <b>29</b>  | <b>22</b>  | <b>29</b>  | Bt.7780.1.S1_at   | peptidase                  |
| SDS              | serine dehydratase                                                              | -         | <b>4</b>   | <b>14</b>  | <b>27</b>  | Bt.5878.1.A1_at   | enzyme                     |
| <b>SLPI</b>      | secretory leukocyte peptidase inhibitor                                         | -         | -          | <b>4</b>   | <b>25</b>  | Bt.15484.2.A1_at  | other                      |
| <b>CXCL6</b>     | chemokine (C-X-C motif) ligand 6 (granulocyte chemotactic protein 2)            | <b>8</b>  | <b>19</b>  | <b>18</b>  | <b>20</b>  | Bt.7165.1.S1_at   | cytokine                   |
| CHI3L1           | chitinase 3-like 1 (cartilage glycoprotein-39)                                  | -         | <b>2</b>   | <b>9</b>   | <b>17</b>  | Bt.5238.1.S1_at   | enzyme                     |
| <b>CFB</b>       | complement factor B                                                             | -         | <b>6</b>   | <b>10</b>  | <b>16</b>  | Bt.13542.1.S1_at  | peptidase                  |
| <b>MUC1</b>      | mucin 1, cell surface associated                                                | -         | <b>2</b>   | <b>3</b>   | <b>12</b>  | Bt.9561.1.S1_at   | other                      |
| <b>S100A8</b>    | S100 calcium binding protein A9                                                 | -         | <b>8</b>   | <b>9</b>   | <b>11</b>  | Bt.9360.1.S1_at   | other                      |
| <b>IFI27L2</b>   | interferon, alpha-inducible protein 27-like 2                                   | -         | <b>3</b>   | <b>9</b>   | <b>11</b>  | Bt.11259.1.S1_at  | other                      |
| <b>C2</b>        | complement component 2                                                          | -         | -          | <b>4</b>   | <b>9</b>   | Bt.24345.1.S1_at  | peptidase                  |
| PLAC8            | placenta-specific 8                                                             | -         | -          | <b>7</b>   | <b>9</b>   | Bt.15912.1.S1_at  | other                      |
| <b>LGALS9</b>    | lectin, galactoside-binding, soluble, 9                                         | -         | <b>2</b>   | <b>4</b>   | <b>8</b>   | Bt.8906.1.S1_at   | other                      |
| UBD              | ubiquitin D                                                                     | -         | -          | <b>2</b>   | <b>7</b>   | Bt.5897.1.S1_at   | other                      |
| <b>HLA-DQA1</b>  | major histocompatibility complex, class II, DQ alpha 1                          | -         | -          | -          | <b>7</b>   | Bt.4751.1.S1_a_at | transmembrane receptor     |
| TSPAN1           | tetraspanin 1                                                                   | -         | -          | -          | <b>6</b>   | Bt.13362.1.S1_at  | other                      |
| PIP5K1B          | phosphatidylinositol-4-phosphate 5-kinase, type I, beta                         | -         | <b>4</b>   | <b>6</b>   | <b>6</b>   | Bt.20732.1.A1_at  | kinase                     |
| C1S              | complement component 1, s subcomponent                                          | -         | -          | <b>3</b>   | <b>6</b>   | Bt.1491.1.S1_at   | peptidase                  |
| <b>APOA1</b>     | apolipoprotein A-I                                                              | -         | <b>2</b>   | <b>3</b>   | <b>6</b>   | Bt.1229.1.S1_at   | transporter                |
| FAM14A           | family with sequence similarity 14, member A                                    | -         | <b>2</b>   | <b>5</b>   | <b>6</b>   | Bt.9779.1.S1_at   | other                      |
| <b>S100A12</b>   | S100 calcium binding protein A12                                                | -         | <b>4</b>   | <b>5</b>   | <b>6</b>   | Bt.357.1.S1_at    | other                      |
| <b>APLN</b>      | apelin                                                                          | -         | -          | <b>5</b>   | <b>6</b>   | Bt.6778.1.S1_at   | other                      |
| SLC5A1           | solute carrier family 5 (sodium/glucose cotransporter), member 1                | -         | <b>2</b>   | <b>3</b>   | <b>5</b>   | Bt.28068.1.S1_at  | transporter                |
| DAO              | D-amino-acid oxidase                                                            | -         | -          | <b>2</b>   | <b>5</b>   | Bt.22705.1.A1_at  | enzyme                     |
| <b>IL33</b>      | interleukin 33                                                                  | -         | -          | <b>2</b>   | <b>5</b>   | Bt.22094.1.A1_at  | cytokine                   |
| <b>OPRM1</b>     | opioid receptor, mu 1                                                           | -         | -          | <b>5</b>   | <b>5</b>   | Bt.21685.1.A1_at  | G-protein coupled receptor |
| <b>LTB</b>       | lymphotoxin beta (TNF superfamily, member 3)                                    | -         | <b>2</b>   | <b>3</b>   | <b>5</b>   | Bt.21431.1.S1_at  | cytokine                   |
| TGM3             | transglutaminase 3 (E polypeptide, protein-glutamine-gamma-glutamyltransferase) | -         | -          | <b>2</b>   | <b>5</b>   | Bt.13628.1.S1_at  | enzyme                     |
| <b>C3</b>        | complement component 3                                                          | -         | -          | <b>2</b>   | <b>5</b>   | Bt.4209.2.S1_at   | peptidase                  |
| KIAA1324         | KIAA1324                                                                        | -         | -          | -          | <b>4</b>   | Bt.28694.1.S1_at  | other                      |

|                 |                                                                                                         |   |   |   |   |                    |                            |
|-----------------|---------------------------------------------------------------------------------------------------------|---|---|---|---|--------------------|----------------------------|
| CRYM            | crystallin, mu                                                                                          | - | - | 2 | 4 | Bt.2913.1.A1_at    | enzyme                     |
| <b>CDO1</b>     | cysteine dioxygenase, type I                                                                            | - | - | 2 | 4 | Bt.2723.1.A1_at    | enzyme                     |
| KAL1            | Kallmann syndrome 1 sequence                                                                            | - | - | - | 4 | Bt.9679.1.S1_at    | other                      |
| ALOX15B         | arachidonate 15-lipoxygenase, type B                                                                    | - | - | 2 | 4 | Bt.12801.1.S1_at   | enzyme                     |
| ADAMTSS         | ADAM metalloproteinase with thrombospondin type 1 motif, 5                                              | - | 3 | 3 | 4 | Bt.24124.1.A1_at   | peptidase                  |
| DAB1            | disabled homolog 1 (Drosophila)                                                                         | - | 2 | - | 4 | Bt.23779.1.A1_at   | other                      |
| <b>SLC7A2</b>   | solute carrier family 7 (cationic amino acid transporter, y+ system), member 2                          | - | 3 | 3 | 4 | Bt.5943.1.S1_at    | transporter                |
| BACE2           | beta-site APP-cleaving enzyme 2                                                                         | - | - | 2 | 3 | Bt.7130.1.S1_at    | peptidase                  |
| OLFML2A         | olfactomedin-like 2A                                                                                    | - | - | - | 3 | Bt.11679.1.S1_at   | other                      |
| CA2             | carbonic anhydrase XII                                                                                  | - | - | 3 | 3 | Bt.6261.1.S1_at    | enzyme                     |
| QSOX1           | quiescin Q6 sulfhydryl oxidase 1                                                                        | - | 3 | 3 | 3 | Bt.23098.1.S1_at   | enzyme                     |
| FMO4            | flavin containing monooxygenase 4                                                                       | - | 2 | 3 | 3 | Bt.5771.1.S1_at    | enzyme                     |
| CDKN1C          | cyclin-dependent kinase inhibitor 1C (p57, Kip2)                                                        | - | - | - | 3 | Bt.4804.2.A1_at    | other                      |
| AGR2            | anterior gradient homolog 2 (Xenopus laevis)                                                            | - | 2 | 2 | 3 | Bt.29129.1.S1_at   | other                      |
| USP54           | ubiquitin specific peptidase 54                                                                         | - | 3 | 3 | 3 | Bt.13345.1.A1_at   | peptidase                  |
| UPP1            | uridine phosphorylase 1                                                                                 | - | - | 3 | 3 | Bt.20327.1.S1_a_at | enzyme                     |
| CAPN6           | calpain 6                                                                                               | - | - | - | 3 | Bt.10150.1.S1_at   | peptidase                  |
| <b>HLA-DRA</b>  | major histocompatibility complex, class II, DR alpha                                                    | - | - | - | 3 | Bt.8552.1.S1_at    | transmembrane receptor     |
| HTR2A           | 5-hydroxytryptamine (serotonin) receptor 2A                                                             | - | - | 2 | 3 | Bt.25378.1.A1_at   | G-protein coupled receptor |
| ACSL6           | acyl-CoA synthetase long-chain family member 6                                                          | - | - | - | 3 | Bt.11904.1.S1_at   | enzyme                     |
| SLCO3A1         | solute carrier organic anion transporter family, member 3A1                                             | - | - | 2 | 3 | Bt.27973.1.S1_at   | transporter                |
| <b>HLA-DQB1</b> | major histocompatibility complex, class II, DQ beta 1                                                   | - | - | - | 3 | Bt.350.1.S1_x_at   | transmembrane receptor     |
| DCBLD2          | discoidin, CUB and LCCL domain containing 2                                                             | - | - | - | 3 | Bt.7728.2.S1_at    | other                      |
| SLC1A1          | solute carrier family 1 (neuronal/epithelial high affinity glutamate transporter, system Xag), member 1 | - | - | 2 | 3 | Bt.23659.1.S1_at   | transporter                |
| COX7A1          | cytochrome c oxidase subunit VIIa polypeptide 1 (muscle)                                                | - | - | 3 | 3 | Bt.76.1.S1_at      | enzyme                     |
| SFRP4           | secreted frizzled-related protein 4                                                                     | - | - | - | 2 | Bt.3540.1.S1_at    | transmembrane receptor     |
| SLAMF9          | SLAM family member 9                                                                                    | - | - | - | 2 | Bt.26229.1.A1_at   | other                      |
| IMPA2           | inositol(myo)-1(or 4)-monophosphatase 2                                                                 | - | - | - | 2 | Bt.1655.1.A1_at    | phosphatase                |
| ERO1L           | ERO1-like (S. cerevisiae)                                                                               | - | - | 2 | 2 | Bt.29332.1.A1_at   | enzyme                     |
| FGL2            | fibrinogen-like 2                                                                                       | - | - | - | 2 | Bt.9202.1.S1_at    | peptidase                  |
| <b>MMP13</b>    | matrix metalloproteinase 13 (collagenase 3)                                                             | - | - | - | 2 | Bt.26268.1.A1_at   | peptidase                  |
| GRIK3           | glutamate receptor, ionotropic, kainate 3                                                               | - | - | - | 2 | Bt.671.1.A1_at     | ion channel                |
| <b>CD200</b>    | CD200 molecule                                                                                          | - | - | - | 2 | Bt.5861.1.S1_at    | other                      |
| C6ORF108        | solute carrier family 44, member 4                                                                      | - | - | 2 | 2 | Bt.24374.1.S1_at   | other                      |
| PFKFB3          | 6-phosphofructo-2-kinase/fructose-2,6-bisphosphatase 3                                                  | - | - | 2 | 2 | Bt.12314.1.S1_at   | kinase                     |
| FOXQ1           | forkhead box Q1                                                                                         | - | - | - | 2 | Bt.15658.1.S1_at   | transcription regulator    |
| STK38L          | serine/threonine kinase 38 like                                                                         | - | - | 2 | 2 | Bt.23995.1.A1_at   | kinase                     |
| ECM1            | extracellular matrix protein 1                                                                          | - | - | - | 2 | Bt.5525.1.S1_at    | transporter                |
| <b>HLA-A</b>    | major histocompatibility complex, class I, A                                                            | - | - | 2 | 2 | Bt.27760.1.S1_at   | transmembrane receptor     |
| LY6E            | lymphocyte antigen 6 complex, locus E                                                                   | - | - | - | 2 | Bt.2346.1.S1_at    | other                      |
| ARRB1           | arrestin, beta 1                                                                                        | - | - | 2 | 2 | Bt.4018.1.S1_at    | other                      |
| HSD3B1          | hydroxy-delta-5-steroid dehydrogenase, 3 beta- and steroid delta-isomerase 1                            | - | - | - | 2 | Bt.4760.1.S1_at    | enzyme                     |
| FNBP1           | formin binding protein 1                                                                                | - | 2 | 2 | 2 | Bt.10381.1.S1_at   | enzyme                     |
| SYT11           | synaptotagmin XI                                                                                        | - | - | - | 2 | Bt.21873.1.S1_at   | transporter                |
| SLC9A7          | solute carrier family 9 (sodium/hydrogen exchanger), member 7                                           | - | - | - | 2 | Bt.21956.1.S1_at   | transporter                |
| GPC6            | glypican 6                                                                                              | - | - | - | 2 | Bt.27332.1.A1_at   | transmembrane receptor     |
| GCA             | granulocitin, EF-hand calcium binding protein                                                           | - | - | - | 2 | Bt.25269.1.S1_at   | other                      |
| <b>CCL28</b>    | chemokine (C-C motif) ligand 28                                                                         | - | - | - | 2 | Bt.16745.1.A1_at   | cytokine                   |
| YPEL5           | yippee-like 5 (Drosophila)                                                                              | - | - | - | 2 | Bt.5748.1.S1_at    | other                      |
| USP20           | ubiquitin specific peptidase 20                                                                         | - | - | - | 2 | Bt.6244.1.S1_at    | peptidase                  |
| QRSL1           | glutaminyl-tRNA synthase (glutamine-hydrolyzing)-like 1                                                 | - | - | - | 2 | Bt.29191.1.A1_at   | enzyme                     |

|                 |                                                                                   |   |   |    |    |                   |                         |
|-----------------|-----------------------------------------------------------------------------------|---|---|----|----|-------------------|-------------------------|
| PPP4R4          | protein phosphatase 4, regulatory subunit 4                                       | - | - | -  | 2  | Bt.20430.1.A1_at  | other                   |
| XDH             | xanthine dehydrogenase                                                            | - | - | -  | 2  | Bt.5403.1.S1_at   | enzyme                  |
| <b>ICAM3</b>    | intercellular adhesion molecule 3                                                 | - | - | -  | 2  | Bt.4293.1.S1_at   | other                   |
| <b>AIF1</b>     | allograft inflammatory factor 1                                                   | - | - | -  | 2  | Bt.23278.1.S1_at  | other                   |
| <b>HLA-DRB1</b> | major histocompatibility complex, class II, DR beta 1                             | - | - | -  | 2  | Bt.28011.1.S1_at  | transmembrane receptor  |
| TMEM204         | transmembrane protein 204                                                         | - | - | -  | 2  | Bt.6054.1.S1_at   | other                   |
| <b>CD74</b>     | CD74 molecule, major histocompatibility complex, class II invariant chain         | - | - | -  | 2  | Bt.23174.1.S1_at  | transmembrane receptor  |
| JAM2            | junctional adhesion molecule 2                                                    | - | - | -  | 2  | Bt.18203.1.A1_at  | other                   |
| <b>MBP</b>      | myelin basic protein                                                              | - | - | -  | 2  | Bt.12606.2.S1_at  | other                   |
| HHAT            | hedgehog acyltransferase                                                          | - | - | -  | 2  | Bt.18717.1.A1_at  | enzyme                  |
| CA12            | carbonic anhydrase II                                                             | - | - | -  | 2  | Bt.22854.1.S1_at  | enzyme                  |
| <b>LTBP1</b>    | latent transforming growth factor beta binding protein 1                          | - | - | -  | 2  | Bt.12315.1.S1_at  | other                   |
| C1QTNF5         | C1q and tumor necrosis factor related protein 5                                   | - | - | -  | 2  | Bt.12216.1.S1_at  | transmembrane receptor  |
| NDRG2           | NDRG family member 2                                                              | - | - | -  | 2  | Bt.2905.1.S1_at   | other                   |
| RHOJ            | ras homolog gene family, member J                                                 | - | - | -  | 2  | Bt.28269.1.S1_at  | enzyme                  |
| FLNB            | filamin B, beta (actin binding protein 278)                                       | - | - | -  | 2  | Bt.18625.1.A1_at  | other                   |
| STRAP           | serine/threonine kinase receptor associated protein                               | - | - | -  | -2 | Bt.5754.2.S1_at   | other                   |
| POGK            | pogo transposable element with KRAB domain                                        | - | - | -  | -2 | Bt.17097.1.S1_at  | other                   |
| <b>CDH1</b>     | cadherin 1, type 1, E-cadherin (epithelial)                                       | - | - | -  | -2 | Bt.13021.1.S1_at  | other                   |
| RAB25           | RAB25, member RAS oncogene family                                                 | - | - | -  | -2 | Bt.20180.1.S1_at  | enzyme                  |
| AP2B1           | adaptor-related protein complex 2, beta 1 subunit                                 | - | - | -  | -2 | Bt.13163.1.S1_at  | transporter             |
| <b>TOMM40</b>   | translocase of outer mitochondrial membrane 40 homolog (yeast)                    | - | - | -  | -2 | Bt.1523.1.S1_at   | ion channel             |
| HNRNPA0         | heterogeneous nuclear ribonucleoprotein A0                                        | - | - | -2 | -2 | Bt.5216.1.S1_at   | other                   |
| CPNE2           | copine II                                                                         | - | - | -  | -2 | Bt.8180.2.S1_at   | other                   |
| PDSS1           | prenyl (decaprenyl) diphosphate synthase, subunit 1                               | - | - | -2 | -2 | Bt.22306.1.S1_at  | enzyme                  |
| TMC6            | transmembrane channel-like 6                                                      | - | - | -  | -2 | Bt.9351.3.S1_a_at | transporter             |
| KRT13           | keratin 13                                                                        | - | - | -  | -2 | Bt.9745.1.A1_at   | other                   |
| <b>AKT1</b>     | v-akt murine thymoma viral oncogene homolog 1                                     | - | - | -  | -2 | Bt.4843.1.S1_at   | kinase                  |
| SF4             | splicing factor 4                                                                 | - | - | -  | -2 | Bt.919.2.S1_at    | other                   |
| MYBL2           | v-myb myeloblastosis viral oncogene homolog (avian)-like 2                        | - | - | -  | -2 | Bt.26890.1.S1_at  | transcription regulator |
| VARS2           | valyl-tRNA synthetase 2, mitochondrial (putative)                                 | - | - | -  | -2 | Bt.11270.2.S1_at  | enzyme                  |
| TRMT1           | TRM1 tRNA methyltransferase 1 homolog (S. cerevisiae)                             | - | - | -  | -2 | Bt.9055.2.S1_a_at | enzyme                  |
| SLC25A15        | solute carrier family 25 (mitochondrial carrier; ornithine transporter) member 15 | - | - | -  | -2 | Bt.20227.1.S1_at  | transporter             |
| CKAP2           | cytoskeleton associated protein 2                                                 | - | - | -2 | -2 | Bt.16065.2.A1_at  | other                   |
| AP2A1           | adaptor-related protein complex 2, alpha 1 subunit                                | - | - | -  | -2 | Bt.26544.2.S1_at  | transporter             |
| TBCE            | tubulin folding cofactor E                                                        | - | - | -  | -2 | Bt.3254.2.S1_at   | other                   |
| PRODH           | proline dehydrogenase (oxidase) 1                                                 | - | - | -  | -2 | Bt.20369.1.S1_at  | enzyme                  |
| HNRNPL          | heterogeneous nuclear ribonucleoprotein L                                         | - | - | -  | -2 | Bt.21801.2.S1_at  | other                   |
| MMGT1           | membrane magnesium transporter 1                                                  | - | - | -  | -2 | Bt.14107.2.S1_at  | other                   |
| SDAD1           | SDA1 domain containing 1                                                          | - | - | -  | -2 | Bt.19687.1.A1_at  | other                   |
| EEF1E1          | eukaryotic translation elongation factor 1 epsilon 1                              | - | - | -  | -2 | Bt.7633.1.S1_at   | translation regulator   |
| SFRS1           | splicing factor, arginine/serine-rich 1                                           | - | - | -  | -2 | Bt.864.2.S1_a_at  | other                   |
| SNX10           | sorting nexin 10                                                                  | - | - | -2 | -2 | Bt.27822.2.S1_at  | transporter             |
| PTBP1           | polypyrimidine tract binding protein 1                                            | - | - | -  | -2 | Bt.9031.1.S1_at   | enzyme                  |
| ETV4            | ets variant 4                                                                     | - | - | -  | -2 | Bt.3533.1.S1_at   | transcription regulator |
| MAPK1           | mitogen-activated protein kinase 1                                                | - | - | -  | -2 | Bt.167.1.S1_at    | kinase                  |
| BCS1L           | BCS1-like (yeast)                                                                 | - | - | -  | -2 | Bt.5278.2.S1_at   | other                   |
| SFN             | stratifin                                                                         | - | - | -  | -2 | Bt.9957.2.S1_at   | other                   |
| TUBA4A          | tubulin, alpha 4a                                                                 | - | - | -  | -2 | Bt.5183.2.S1_at   | other                   |
| CCNY            | cyclin Y                                                                          | - | - | -  | -2 | Bt.11154.2.S1_at  | other                   |
| RASL12          | RAS-like, family 12                                                               | - | - | -  | -2 | Bt.16808.2.A1_at  | enzyme                  |

|               |                                                                                 |   |    |    |    |                    |                         |
|---------------|---------------------------------------------------------------------------------|---|----|----|----|--------------------|-------------------------|
| FRMD3         | FERM domain containing 3                                                        | - | -  | -2 | -2 | Bt.26688.2.S1_a_at | other                   |
| ASF1B         | ASF1 anti-silencing function 1 homolog B (S. cerevisiae)                        | - | -  | -2 | -2 | Bt.23658.2.S1_at   | other                   |
| CENPM         | centromere protein M                                                            | - | -  | -  | -2 | Bt.27805.2.S1_a_at | other                   |
| ARHGAP19      | Rho GTPase activating protein 19                                                | - | -  | -2 | -2 | Bt.26071.1.A1_at   | other                   |
| FLOT2         | flotillin 2                                                                     | - | -  | -  | -2 | Bt.25720.1.S1_at   | other                   |
| DNASE1L1      | deoxyribonuclease I-like 1                                                      | - | -  | -  | -2 | Bt.28559.1.S1_a_at | enzyme                  |
| SLC44A4       | chromosome 6 open reading frame 108                                             | - | -  | -  | -2 | Bt.6162.1.S1_at    | other                   |
| NOP2          | NOP2 nucleolar protein homolog (yeast)                                          | - | -  | -  | -2 | Bt.1040.3.S1_at    | other                   |
| MYO1B         | myosin IB                                                                       | - | -  | -  | -2 | Bt.16836.1.S1_at   | other                   |
| ORC1L         | origin recognition complex, subunit 1-like (yeast)                              | - | -  | -  | -2 | Bt.2111.1.S1_a_at  | other                   |
| SLC7A5        | solute carrier family 7 (cationic amino acid transporter, y+ system), member 5  | - | -  | -  | -2 | Bt.5528.1.S1_at    | transporter             |
| WDR46         | WD repeat domain 46                                                             | - | -  | -2 | -2 | Bt.4534.2.S1_at    | enzyme                  |
| MARS          | methionyl-tRNA synthetase                                                       | - | -  | -  | -2 | Bt.9306.3.S1_at    | enzyme                  |
| GYPC          | glycophorin C (Gerbich blood group)                                             | - | -  | -2 | -2 | Bt.11221.1.S1_at   | other                   |
| PPP5C         | protein phosphatase 5, catalytic subunit                                        | - | -  | -2 | -3 | Bt.23237.1.S1_at   | phosphatase             |
| H1F0          | H1 histone family, member 0                                                     | - | -  | -2 | -3 | Bt.24209.1.S1_at   | other                   |
| BUB1          | budding uninhibited by benzimidazoles 1 homolog (yeast)                         | - | -  | -  | -3 | Bt.21513.2.S1_at   | kinase                  |
| AP3S2         | adaptor-related protein complex 3, sigma 2 subunit                              | - | -  | -  | -3 | Bt.8933.2.S1_at    | transporter             |
| CARS          | cysteinyl-tRNA synthetase                                                       | - | -  | -2 | -3 | Bt.18835.2.S1_at   | enzyme                  |
| SRM           | spermidine synthase                                                             | - | -  | -  | -3 | Bt.9078.2.S1_a_at  | enzyme                  |
| PSAT1         | phosphoserine aminotransferase 1                                                | - | -  | -  | -3 | Bt.13588.3.A1_at   | enzyme                  |
| SLC7A11       | solute carrier family 7, (cationic amino acid transporter, y+ system) member 11 | - | -  | -  | -3 | Bt.2849.1.S1_at    | transporter             |
| GPD1L         | glycerol-3-phosphate dehydrogenase 1-like                                       | - | -2 | -3 | -3 | Bt.17341.1.S1_at   | enzyme                  |
| SLC1A4        | solute carrier family 1 (glutamate/neutral amino acid transporter), member 4    | - | -  | -  | -3 | Bt.13712.1.S1_at   | transporter             |
| <b>RNASE6</b> | ribonuclease, RNase A family, k6                                                | - | -  | -3 | -3 | Bt.287.1.S1_at     | enzyme                  |
| LIG1          | ligase I, DNA, ATP-dependent                                                    | - | -  | -3 | -3 | Bt.12876.3.S1_a_at | enzyme                  |
| DIRAS3        | DIRAS family, GTP-binding RAS-like 3                                            | - | -  | -3 | -3 | Bt.12283.1.A1_at   | enzyme                  |
| BRCA1         | breast cancer 1, early onset                                                    | - | -  | -2 | -3 | Bt.22878.2.S1_a_at | transcription regulator |
| DTNB          | dystrobrevin, beta                                                              | - | -  | -  | -3 | Bt.7860.2.S1_a_at  | other                   |

\* - means not significant regulated

\*\* bold letters means IPA functional category "Inflammatory Response"

**Table S4B: Human ortholog genes eligible for IPA, with maximal regulation at indicated time points**

**B) Genes regulated in *S. aureus* stimulated pbMEC**

| Symbol                                         | Entrez Gene Name                                                                   | fold change |     |     |      | Bovine Affy.-ID    | Type (IPA)                        |
|------------------------------------------------|------------------------------------------------------------------------------------|-------------|-----|-----|------|--------------------|-----------------------------------|
|                                                |                                                                                    | 1 h         | 3 h | 6 h | 24 h |                    |                                   |
| <b>Maximum regulated 1 h after stimulation</b> |                                                                                    |             |     |     |      |                    |                                   |
| CYP1B1                                         | cytochrome P450, family 1, subfamily B, polypeptide 1                              | 25          | 18  | -   | -    | Bt.16058.2.S1_at   | enzyme                            |
| MAP3K8                                         | mitogen-activated protein kinase kinase kinase 8                                   | 6           | 4   | 3   | 3    | Bt.28561.1.S1_at   | kinase                            |
| SIK1                                           | salt-inducible kinase 1                                                            | 4           | -   | -   | -    | Bt.21518.1.S1_at   | kinase                            |
| TIPARP                                         | TCDD-inducible poly polymerase                                                     | 4           | 2   | -   | -    | Bt.23611.2.S1_at   | other                             |
| NR4A2                                          | nuclear receptor subfamily 4, group A, member 2                                    | 4           | -   | -   | -    | Bt.10060.1.S1_at   | ligand-dependent nuclear receptor |
| DLX2                                           | distal-less homeobox 2                                                             | 3           | -   | -   | -    | Bt.13363.1.A1_at   | transcription regulator           |
| <b>PDE4B</b>                                   | phosphodiesterase 4B, cAMP-specific                                                | 2           | -   | -   | -    | Bt.20286.1.S1_at   | enzyme                            |
| NR4A1                                          | nuclear receptor subfamily 4, group A, member 1                                    | 2           | -   | -   | -    | Bt.23373.1.S1_at   | ligand-dependent nuclear receptor |
| <b>IER3</b>                                    | immediate early response 3                                                         | 2           | -   | -   | -    | Bt.2153.1.S1_at    | other                             |
| FOXQ1                                          | forkhead box Q1                                                                    | 2           | -   | -   | -    | Bt.15658.1.S1_at   | transcription regulator           |
| GEM                                            | GTP binding protein overexpressed in skeletal muscle                               | 2           | -   | -   | -    | Bt.28062.1.S1_at   | enzyme                            |
| DKK1                                           | dickkopf homolog 1 ( <i>Xenopus laevis</i> )                                       | -2          | -   | -   | -    | Bt.13880.1.S1_at   | growth factor                     |
| ADAMTS1                                        | ADAM metalloproteinase with thrombospondin type 1 motif, 1                         | -3          | -   | -   | -    | Bt.12010.2.S1_at   | peptidase                         |
| <b>Maximum regulated 3 h after stimulation</b> |                                                                                    |             |     |     |      |                    |                                   |
| CYP1A1                                         | cytochrome P450, family 1, subfamily A, polypeptide 1                              | 75          | 391 | 95  | -    | Bt.13772.1.A1_at   | enzyme                            |
| <b>CXCL2</b>                                   | chemokine (C-X-C motif) ligand 2                                                   | 4           | 24  | 13  | 16   | Bt.610.1.A1_at     | cytokine                          |
| <b>CXCL1</b>                                   | chemokine (C-X-C motif) ligand 1                                                   | 3           | 17  | 7   | 13   | Bt.611.1.S1_x_at   | cytokine                          |
| <b>IL8</b>                                     | interleukin 8                                                                      | -           | 5   | 4   | 4    | Bt.155.1.S1_at     | cytokine                          |
| NAV3                                           | neuron navigator 3                                                                 | -           | 3   | -   | -    | Bt.25031.1.S1_at   | other                             |
| <b>TNFAIP3</b>                                 | tumor necrosis factor, alpha-induced protein 3                                     | -           | 3   | 2   | 3    | Bt.17514.1.S1_at   | other                             |
| <b>NFKBIZ</b>                                  | nuclear factor of kappa light polypeptide gene enhancer in B-cells inhibitor, zeta | -           | 3   | 2   | 2    | Bt.8227.1.S1_at    | transcription regulator           |
| MYRIP                                          | myosin VIIA and Rab interacting protein                                            | -           | 3   | 2   | -    | Bt.26660.1.S1_at   | other                             |
| <b>CXCL3</b>                                   | chemokine (C-X-C motif) ligand 3                                                   | -           | 3   | 2   | 2    | Bt.23093.1.S1_at   | cytokine                          |
| NR4A3                                          | nuclear receptor subfamily 4, group A, member 3                                    | 2           | 2   | -   | -    | Bt.17173.1.A1_at   | ligand-dependent nuclear receptor |
| BMF                                            | Bcl2 modifying factor                                                              | -           | 2   | -   | -    | Bt.20027.1.S1_at   | other                             |
| ANGPTL4                                        | angiotensin-like 4                                                                 | -           | 2   | -   | -    | Bt.4816.1.S1_at    | other                             |
| RNF144B                                        | ring finger protein 144B                                                           | -           | 2   | -   | -    | Bt.6796.1.A1_at    | enzyme                            |
| RARB                                           | retinoic acid receptor, beta                                                       | -           | 2   | -   | -    | Bt.21044.1.A1_at   | ligand-dependent nuclear receptor |
| <b>Maximum regulated 6 h after stimulation</b> |                                                                                    |             |     |     |      |                    |                                   |
| <b>CXCL6</b>                                   | chemokine (C-X-C motif) ligand 6 (granulocyte chemotactic protein 2)               | -           | 5   | 7   | 6    | Bt.7165.1.S1_at    | cytokine                          |
| PPP1R3C                                        | protein phosphatase 1, regulatory (inhibitor) subunit 3C                           | -           | 2   | 5   | 5    | Bt.13484.1.A1_at   | phosphatase                       |
| <b>SLC2A3</b>                                  | solute carrier family 2, member 3                                                  | -           | -   | 4   | 4    | Bt.3964.1.S1_at    | transporter                       |
| STC1                                           | stanniocalcin 1                                                                    | -           | -   | 3   | -    | Bt.10272.1.S1_at   | kinase                            |
| SLC7A11                                        | solute carrier family 7, (cationic amino acid transporter, y+ system) member 11    | -           | -   | 2   | -    | Bt.2849.1.S1_at    | transporter                       |
| <b>CD38</b>                                    | CD38 antigen                                                                       | -           | -   | 2   | -    | Bt.27365.1.A1_at   | enzyme                            |
| ABCB1                                          | ATP-binding cassette, sub-family B (MDR/TAP), member 1                             | -           | 2   | 2   | -    | Bt.29740.1.S1_at   | transporter                       |
| IGFBP5                                         | insulin-like growth factor binding protein 5                                       | -           | -   | -2  | -    | Bt.21465.1.S1_at   | other                             |
| <b>SERPING1</b>                                | serpin peptidase inhibitor, clade G (C1 inhibitor), member 1                       | -           | -   | -2  | -    | Bt.22969.1.S1_a_at | other                             |

|     |                            |   |   |    |   |                  |        |
|-----|----------------------------|---|---|----|---|------------------|--------|
| APC | adenomatous polyposis coli | - | - | -2 | - | Bt.19631.1.A1_at | enzyme |
|-----|----------------------------|---|---|----|---|------------------|--------|

**Maximum regulated 24 h after stimulation**

|                |                                                                                         |   |   |   |    |                   |                         |
|----------------|-----------------------------------------------------------------------------------------|---|---|---|----|-------------------|-------------------------|
| <b>SAA3</b>    | serum amyloid A3                                                                        | - | 2 | 6 | 37 | Bt.278.1.S1_at    | other                   |
| <b>CCL5</b>    | chemokine (C-C motif) ligand 5                                                          | - | - | - | 31 | Bt.552.1.S1_at    | cytokine                |
| <b>HP</b>      | haptoglobin                                                                             | - | - | 3 | 22 | Bt.12553.1.S1_at  | peptidase               |
| <b>MX2</b>     | myxovirus (influenza virus) resistance 2 (mouse)                                        | - | - | - | 19 | Bt.8143.1.S1_at   | enzyme                  |
| RTP4           | receptor (chemosensory) transporter protein 4                                           | - | - | - | 15 | Bt.24813.2.S1_at  | other                   |
| IFIT2          | interferon-induced protein with tetratricopeptide repeats 2                             | - | - | - | 10 | Bt.24795.1.A1_at  | other                   |
| RSAD2          | radical S-adenosyl methionine domain containing 2                                       | - | - | - | 10 | Bt.24467.1.S1_at  | enzyme                  |
| SLC27A1        | solute carrier family 27 (fatty acid transporter), member 1                             | - | - | - | 8  | Bt.15788.3.S1_at  | transporter             |
| <b>IFI44</b>   | interferon-induced protein 44                                                           | - | - | - | 7  | Bt.20785.1.A1_at  | other                   |
| PLAC8          | placenta-specific 8                                                                     | - | - | - | 7  | Bt.15912.1.S1_at  | other                   |
| <b>MX1</b>     | myxovirus (influenza virus) resistance 1                                                | - | - | - | 6  | Bt.4675.1.S1_a_at | enzyme                  |
| EIF4E          | eukaryotic translation initiation factor 4E                                             | - | - | - | 6  | Bt.17195.1.A1_at  | translation regulator   |
| <b>GBP2</b>    | guanylate binding protein 2, interferon-inducible                                       | - | - | - | 5  | Bt.25303.1.A1_at  | enzyme                  |
| <b>IL18BP</b>  | interleukin 18 binding protein                                                          | - | - | - | 5  | Bt.22116.1.A1_at  | other                   |
| <b>IFI44L</b>  | interferon-induced protein 44-like                                                      | - | - | - | 5  | Bt.25111.1.A1_at  | other                   |
| <b>OAS1</b>    | 2',5'-oligoadenylate synthetase 1, 40/46kDa                                             | - | - | - | 5  | Bt.20891.1.S1_at  | enzyme                  |
| RNF213         | ring finger protein 213                                                                 | - | - | - | 4  | Bt.9179.1.A1_at   | other                   |
| <b>CCL2</b>    | chemokine (C-C motif) ligand 2                                                          | - | 3 | 3 | 4  | Bt.2408.1.S1_s_at | cytokine                |
| <b>IFI6</b>    | interferon, alpha-inducible protein 6                                                   | - | - | - | 4  | Bt.8436.1.S1_at   | other                   |
| <b>IFIH1</b>   | interferon induced with helicase C domain 1                                             | - | - | - | 4  | Bt.16857.1.A1_at  | enzyme                  |
| USP18          | ubiquitin specific peptidase 18                                                         | - | - | - | 4  | Bt.23233.2.S1_at  | peptidase               |
| RND1           | Rho family GTPase 1                                                                     | - | 4 | 3 | 4  | Bt.3774.1.A1_at   | enzyme                  |
| SP100          | SP100 nuclear antigen                                                                   | - | - | - | 4  | Bt.21851.1.A1_at  | transcription regulator |
| <b>LTF</b>     | lactotransferrin                                                                        | - | 3 | 2 | 4  | Bt.7780.1.S1_at   | peptidase               |
| <b>ISG20</b>   | interferon stimulated exonuclease gene 20kDa                                            | - | - | - | 4  | Bt.22275.1.A1_at  | enzyme                  |
| <b>LGALS9</b>  | lectin, galactoside-binding, soluble, 9                                                 | - | - | - | 4  | Bt.8906.1.S1_at   | other                   |
| <b>DDX58</b>   | DEAD (Asp-Glu-Ala-Asp) box polypeptide 58                                               | - | - | - | 4  | Bt.24033.1.A1_at  | enzyme                  |
| <b>IL6</b>     | interleukin 6 (interferon, beta 2)                                                      | - | 3 | 3 | 4  | Bt.3686.1.S1_at   | cytokine                |
| <b>NOS2</b>    | nitric oxide synthase 2, inducible                                                      | - | - | - | 3  | Bt.8479.1.A1_at   | enzyme                  |
| <b>NFKBIA</b>  | nuclear factor of kappa light polypeptide gene enhancer in B-cells inhibitor, alpha     | - | 2 | - | 3  | Bt.9027.1.S1_at   | other                   |
| <b>CCL20</b>   | chemokine ligand 20                                                                     | - | 2 | 2 | 3  | Bt.9560.1.S1_at   | cytokine                |
| UBA7           | ubiquitin-like modifier activating enzyme 7                                             | - | - | - | 3  | Bt.2294.1.S1_a_at | enzyme                  |
| CADPS          | Ca <sup>++</sup> -dependent secretion activator                                         | - | - | - | 3  | Bt.16070.1.S1_at  | other                   |
| GBP3           | guanylate binding protein 3                                                             | - | - | - | 3  | Bt.9296.1.A1_at   | enzyme                  |
| <b>ISG15</b>   | ISG15 ubiquitin-like modifier                                                           | - | - | - | 3  | Bt.12304.1.S1_at  | other                   |
| <b>MUC1</b>    | mucin 1, transmembrane                                                                  | - | - | - | 3  | Bt.9561.1.S1_at   | other                   |
| <b>EIF2AK2</b> | eukaryotic translation initiation factor 2-alpha kinase 2                               | - | - | - | 3  | Bt.20923.1.S1_at  | kinase                  |
| IFI16          | interferon, gamma-inducible protein 16                                                  | - | - | - | 3  | Bt.22021.1.S1_at  | transcription regulator |
| XAF1           | XIAP associated factor 1                                                                | - | - | - | 3  | Bt.5259.1.S1_at   | other                   |
| GBP4           | guanylate binding protein 4                                                             | - | - | - | 3  | Bt.28744.1.S1_at  | enzyme                  |
| UBD            | ubiquitin D                                                                             | - | - | - | 2  | Bt.5897.2.S1_at   | other                   |
| <b>HIF1A</b>   | hypoxia inducible factor 1, alpha subunit (basic helix-loop-helix transcription factor) | - | - | 2 | 2  | Bt.25110.1.A1_at  | transcription regulator |
| <b>NFKB2</b>   | nuclear factor of kappa light polypeptide gene enhancer in B-cells 2 (p49/p100)         | - | - | 2 | 2  | Bt.20288.1.S1_at  | transcription regulator |
| TGM3           | transglutaminase 3 (E polypeptide, protein-glutamine-gamma-glutamyltransferase)         | - | - | 2 | 2  | Bt.13628.1.S1_at  | enzyme                  |
| EGLN3          | egl nine homolog 3 (C. elegans)                                                         | - | - | - | 2  | Bt.23232.1.S1_at  | enzyme                  |
| DTX3L          | deltex 3-like (Drosophila)                                                              | - | - | - | 2  | Bt.28523.1.S1_at  | other                   |
| LGALS3BP       | lectin, galactoside-binding, soluble, 3 binding protein                                 | - | - | - | 2  | Bt.6597.2.S1_a_at | transmembrane receptor  |

|                 |                                                                                                        |   |   |    |    |                    |                            |
|-----------------|--------------------------------------------------------------------------------------------------------|---|---|----|----|--------------------|----------------------------|
| SMN2            | survival of motor neuron 2, centromeric                                                                | - | - | -  | 2  | Bt.15979.1.S1_at   | other                      |
| <b>SP140</b>    | SP140 nuclear body protein                                                                             | - | - | -  | 2  | Bt.27830.1.A1_at   | transcription regulator    |
| IFIT5           | interferon-induced protein with tetratricopeptide repeats 5                                            | - | - | -  | 2  | Bt.22130.1.S1_at   | other                      |
| PNPT1           | polyribonucleotide nucleotidyltransferase 1                                                            | - | - | -  | 2  | Bt.5684.1.S1_at    | enzyme                     |
| FAM14A          | family with sequence similarity 14, member A                                                           | - | - | -  | 2  | Bt.9779.1.S1_at    | other                      |
| PARP9           | poly (ADP-ribose) polymerase family, member 9                                                          | - | - | -  | 2  | Bt.20409.1.S1_at   | other                      |
| <b>TNFSF13b</b> | tumor necrosis factor (ligand) superfamily, member 13b                                                 | - | - | -  | 2  | Bt.24855.2.S1_at   | cytokine                   |
| MXI1            | MAX interactor 1                                                                                       | - | - | 2  | 2  | Bt.20431.2.S1_at   | transcription regulator    |
| TRIM5           | tripartite motif-containing 5                                                                          | - | - | -  | 2  | Bt.16983.1.S1_at   | other                      |
| <b>IRF7</b>     | interferon regulatory factor 7                                                                         | - | - | -  | 2  | Bt.5768.1.S1_at    | transcription regulator    |
| <b>SOD2</b>     | superoxide dismutase 2, mitochondrial                                                                  | - | - | -  | 2  | Bt.2501.2.A1_at    | enzyme                     |
| <b>TLR2</b>     | toll-like receptor 2                                                                                   | - | - | -  | 2  | Bt.8945.1.S1_at    | transmembrane receptor     |
| CASP7           | caspase 7, apoptosis-related cysteine peptidase                                                        | - | - | -  | 2  | Bt.28094.1.S1_at   | peptidase                  |
| <b>IKBKE</b>    | inhibitor of kappa light polypeptide gene enhancer in B-cells, kinase epsilon                          | - | - | -  | 2  | Bt.1472.1.S1_at    | kinase                     |
| HSD3B1          | hydroxy-delta-5-steroid dehydrogenase, 3 beta- and steroid delta-isomerase 1                           | - | - | -  | 2  | Bt.4760.1.S1_at    | enzyme                     |
| PFKFB3          | 6-phosphofructo-2-kinase/fructose-2,6-biphosphatase 3                                                  | - | - | 2  | 2  | Bt.12314.1.S1_at   | kinase                     |
| BTC             | betacellulin                                                                                           | - | - | -  | 2  | Bt.236.1.S1_at     | growth factor              |
| COIL            | coilin                                                                                                 | - | - | -  | 2  | Bt.9075.1.S1_at    | other                      |
| GBP5            | guanylate binding protein 5                                                                            | - | - | -  | 2  | Bt.21773.2.S1_at   | enzyme                     |
| <b>TAP1</b>     | transporter 1, ATP-binding cassette, sub-family B (MDR/TAP)                                            | - | - | -  | 2  | Bt.20416.1.S1_at   | transporter                |
| <b>CD40</b>     | CD40 molecule, TNF receptor superfamily member 5                                                       | - | - | -  | 2  | Bt.13130.1.S1_at   | transmembrane receptor     |
| SAMD9           | sterile alpha motif domain containing 9                                                                | - | - | -  | 2  | Bt.28624.1.S1_at   | other                      |
| <b>VEGFA</b>    | vascular endothelial growth factor A                                                                   | - | - | -  | 2  | Bt.4138.1.S1_a_at  | growth factor              |
| <b>SLPI</b>     | secretory leukocyte protease inhibitor                                                                 | - | - | -  | 2  | Bt.15484.2.A1_at   | other                      |
| <b>CENPF</b>    | centromere protein F, 350/400ka (mitosin)                                                              | - | - | -  | -2 | Bt.27668.1.A1_at   | other                      |
| ISM1            | isthmin 1 homolog (zebrafish)                                                                          | - | - | -  | -2 | Bt.19183.1.A1_at   | other                      |
| DZIP3           | DAZ interacting protein 3, zinc finger                                                                 | - | - | -  | -2 | Bt.19781.1.A1_at   | enzyme                     |
| PQBP1           | polyglutamine binding protein 1                                                                        | - | - | -  | -2 | Bt.22125.2.A1_at   | transcription regulator    |
| ELSPBP1         | epididymal sperm binding protein 1                                                                     | - | - | -  | -2 | Bt.224.1.S1_at     | other                      |
| <b>EDNRA</b>    | endothelin receptor type A                                                                             | - | - | -  | -2 | Bt.4719.1.S1_at    | transmembrane receptor     |
| DYNC2H1         | dynein, cytoplasmic 2, heavy chain 1                                                                   | - | - | -  | -2 | Bt.24983.1.A1_at   | other                      |
| <b>CFTR</b>     | cystic fibrosis transmembrane conductance regulator (ATP-binding cassette sub-family C, member 7)      | - | - | -  | -2 | Bt.19505.1.A1_at   | ion channel                |
| PDGFRA          | platelet-derived growth factor receptor, alpha polypeptide                                             | - | - | -  | -2 | Bt.9423.1.S1_at    | kinase                     |
| TCF7L1          | transcription factor 7-like 1 (T-cell specific, HMG-box)                                               | - | - | -  | -2 | Bt.17343.1.S1_at   | transcription regulator    |
| ACSM1           | acyl-CoA synthetase medium-chain family member 1                                                       | - | - | -2 | -2 | Bt.4604.1.S1_a_at  | enzyme                     |
| MMGT1           | membrane magnesium transporter 1                                                                       | - | - | -  | -2 | Bt.14107.2.S1_at   | other                      |
| REV3L           | REV3-like, catalytic subunit of DNA polymerase zeta (yeast)                                            | - | - | -  | -2 | Bt.25319.2.S1_at   | enzyme                     |
| ARSK            | arylsulfatase family, member K                                                                         | - | - | -  | -2 | Bt.16276.1.A1_at   | enzyme                     |
| RBP1            | retinol binding protein 1, cellular                                                                    | - | - | -  | -2 | Bt.17810.1.S1_a_at | transporter                |
| SLC16A4         | solute carrier family 16, member 4 (monocarboxylic acid transporter 5)                                 | - | - | -  | -2 | Bt.22085.1.S1_at   | transporter                |
| <b>MYH11</b>    | myosin, heavy chain 11, smooth muscle                                                                  | - | - | -  | -2 | Bt.12685.1.S1_at   | other                      |
| FRMD3           | FERM domain containing 3                                                                               | - | - | -  | -2 | Bt.17702.1.A1_at   | other                      |
| CDH2            | cadherin 2, type 1, N-cadherin (neuronal)                                                              | - | - | -  | -2 | Bt.4417.1.S1_at    | other                      |
| TSPAN12         | tetraspanin 12                                                                                         | - | - | -  | -2 | Bt.29152.1.S1_at   | other                      |
| PDGFD           | platelet derived growth factor D                                                                       | - | - | -  | -2 | Bt.20743.1.A1_at   | growth factor              |
| GRIA3           | glutamate receptor, ionotropic, AMPA 3                                                                 | - | - | -  | -2 | Bt.3178.1.A1_at    | ion channel                |
| EMCN            | endomucin                                                                                              | - | - | -  | -2 | Bt.5003.1.S1_at    | other                      |
| <b>CALCRL</b>   | calcitonin receptor-like                                                                               | - | - | -  | -2 | Bt.14578.1.A1_at   | G-protein coupled receptor |
| COL15A1         | collagen, type XV, alpha 1                                                                             | - | - | -  | -2 | Bt.20512.1.S1_at   | other                      |
| DIRAS3          | DIRAS family, GTP-binding RAS-like 3                                                                   | - | - | -  | -3 | Bt.12283.1.A1_at   | enzyme                     |
| <b>SERPINF1</b> | serpin peptidase inhibitor, clade F (alpha-2 antiplasmin, pigment epithelium derived factor), member 1 | - | - | -  | -3 | Bt.2638.1.S1_at    | other                      |
| TCF4            | transcription factor 4                                                                                 | - | - | -  | -3 | Bt.5682.1.S1_at    | transcription regulator    |

|               |                                                        |   |   |           |           |                  |       |
|---------------|--------------------------------------------------------|---|---|-----------|-----------|------------------|-------|
| ARL15         | ADP-ribosylation factor-like 15                        | - | - | <b>-2</b> | <b>-3</b> | Bt.17024.1.A1_at | other |
| <u>IQGAP2</u> | <u>IQ motif containing GTPase activating protein 2</u> | - | - | -         | <b>-3</b> | Bt.20947.1.S1_at | other |

---

\* - means not significant regulated

\*\* bold letters means IPA functional category "Inflammatory Response"
